# Supplementary material for: Structural dynamics in the evolution of a bilobed protein scaffold
Source: PubMed Central journal article supplement — Proc Natl Acad Sci U S A. 2021 Nov 29;118(49):e2026165118. doi: 10.1073/pnas.2026165118 (PMC8694067; doi:10.1073/pnas.2026165118), 2021-11-29
Supplement: pnas.2026165118.sapp.pdf [file pnas.2026165118.sapp.pdf]

## 1 MATERIAL AND METHOD

### 2 Structural analysis & Phylogenetic trees

3 Proteins harbouring the *cherry-core* (*CC*) structure were identified using the “Structure similarity search  
4 function” of the PDB web server (1, 2). Protein structures were aligned using the PDBeFold server (3).  
5 Additionally, protein structures were downloaded and superimposed using Pymol (Molecular Graphics  
6 System, Version 1.6 Schrödinger, LLC) in order to verify and correct manually the results obtained via the  
7 PDBeFold server.

8 The structure-based phylogenetic trees as presented in *Dataset S2*, 6 and summarized in Fig. 1C  
9 were created for proteins with known structures using the “all against all structure comparison” feature of  
10 the DALI server (4). In the summarized sequence- and structure-based phylogenetic trees as presented in  
11 Fig. 1C and *SI appendix*, Fig. S1; the branch of each class has an average length of the branches of all  
12 proteins belonging to the very same class obtained from trees presented in *Dataset S2*, 6.

13 Sequence-based phylogenetic trees as presented in *Dataset S1* and summarized in *SI appendix*,  
14 Fig. S1 were computed using the MultiSeq software (5) embedded within the Visual Molecular Dynamics  
15 (VMD 1.9.2) software package (6). Briefly, these trees were based on the percent of sequence identity  
16 (PID) of polypeptide chains after the structure-based sequence alignment. Given the fact that the *CC*  
17 proteins (*CCPs*) share little amount of sequence conservation, MultiSeq was used to optimize the sequence  
18 alignment based on the structural alignment template. The alignments of MultiSeq have all been manually  
19 inspected.

20 The sequence-based extended phylogenetic tree as presented in *Dataset S1* and summarized in  
21 *SI appendix*, Fig. S1 was made using sequence information of proteins with unknown structural information.  
22 We used the 53 *CCPs* with known structures to retrieve homologous protein sequences by inspecting the  
23 UniProtKB/Swiss-Prot (swissprot) database with Protein Blast (7). Our cut-off for sequence coverage was  
24 70%, which yielded ~600 proteins that allowed to construct an extended sequence-based phylogenetic  
25 tree. In all analysis, servers’ default settings were used unless specified.

### 26 Structural states of the *cherry-core*

27 Domain movements were detected via the DynDom protein domain motion analysis server (8, 9) for all the  
28 proteins that have high resolution informational of both structural states available. Interactions between the  
29 C-tail and the domains were analysed by submitting the PDB ID codes corresponding to *apo* and *holo*  
30 states (*SI appendix*, Table. S2) in the Protein Interactions Calculator (PIC) webserver (10). Similarly, the  
31 interactions between the N-terminal dimerization helix and the connecting-loop to the *CC* of class A proteins  
32 were retrieved and presented in *Dataset S7*. Standard cut-off distances for all interactions were used. The  
33 interactions were also manually inspected using Pymol (Molecular Graphics System, Version 1.6  
34 Schrödinger, LLC). Cartoon protein representations, superimposition of structures and distance  
35 calculations between residues were accomplished using Pymol (Molecular Graphics System, Version 1.6  
36 Schrödinger, LLC).

### 37 Gene isolation, protein expression and purification

38  
39 His<sub>10</sub>SBD2 (Class B), OpuACHis<sub>6</sub> (Class C), MalEHis<sub>6</sub> (Class G) were expressed and purified as previously  
40 described (11-13). The *CC* of *cynR* (Class A) gene (UniProtKB-P27111) was isolated from the genome of  
41 Escherichia coli DH5α (F– endA1 glnV44 thi-1 recA1 relA1 gyrA96 deoR nupG purB20 φ80dlacZΔM15  
42 Δ(lacZYA-argF)U169, hsdR17(rK–mK+), λ–). The primers were designed to exclude the HTH LysR-type  
43 DNA binding domain (1-58 amino acid); thus, to include DNA sequence coding the protein chain 59-299  
44 amino acid. Primers introduced *Nde* I and *Bam* HI restriction sites, and the gene product was sub-cloned  
45 into the pET16 vector (Novagen, EMD Millipore). For full length CynR, the same procedure was adopted  
46 by including amino acids 1-58. CmpA (class E) gene (UniProtKB-Q55460) was isolated from the genome  
47 of *Synechocystis sp. (strain PCC 6803)* – ATCC 27184D-5. The primers were designed to exclude the  
48 signal peptide (1-35 amino acid); thus, to include the DNA sequence coding the protein chain 36-452 amino  
49

50 acid. PhnD (class D) gene (UniProtKB-Q1R3F7) was isolated from the genome of *Escherichia coli* BL21-  
51 DE3 (F<sup>-</sup> ompT gal dcm lon hsdSB(rB-mB-) λ(DE3 [lacI lacUV5-T7p07 ind1 sam7 nin5]) [malB+]K-12(λS)).  
52 The primers were designed to exclude the signal peptide (1-26 amino acid); thus, to include DNA sequence  
53 coding the protein chain 27-338 amino acid. nFbp (class F) gene (UniProtKB-Q50964) was isolated from  
54 the genome of *Neisseria gonorrhoeae* – ATCC 700825D-5. The primers were designed to exclude the  
55 signal peptide (1-22 amino acid); thus, to include DNA sequence coding the protein chain 23-331 amino  
56 acid. (pro)malE gene (UniProt:P0AEX9) was isolated from the genome of *Escherichia coli* K12. The primers  
57 were designed to include the signal peptide (1-26 amino acids). Primers introduced *Nde*I and *Hind*III  
58 restriction sites and the gene product was sub-cloned into the pET20b vector (Merck).

59 The intergenic region of the CynR operon was isolated from the genome of *Escherichia coli* BL21-  
60 DE3 (F<sup>-</sup> ompT gal dcm lon hsdSB(rB-mB-) λ(DE3 [lacI lacUV5-T7p07 ind1 sam7 nin5]) [malB+]K-12(λS))  
61 using a set of primers, i.e., the forward primers - X379 (5'- CCA TGT TCA GCC ACG GCA AGA AAA TAA  
62 TTG ATA TG -3') and the reverse - X380 (5'- CTG GAA TTT AAG GAA TCC ATC AAT AAT CTC TTT CAC  
63 CG -3'). The amplification of the intergenic region results in the 191 bp DNA fragment, which was used as  
64 the binding partner of CynR for further experiments.

65 Protein derivatives having the cysteine mutations or the point mutations indicated into brackets  
66 throughout the manuscript were constructed using QuickChange mutagenesis(14) and Megaprimer PCR  
67 mutagenesis(15) protocols.

68 His<sub>10</sub>CynR (CC) was over-expressed in BL21 DE3 cells (F<sup>-</sup> ompT gal dcm lon hsdSB(rB-mB-) λ(DE3 [lacI lacUV5-T7p07 ind1 sam7 nin5]) [malB+]K-12(λS)). Cells harbouring the plasmid expressing the  
69 protein were grown in Terrific Broth medium (30°C; OD<sub>600 nm</sub>=0.5) and protein overexpression was induced  
70 by IPTG (0.10 mM; growth at 16°C for 15 hours).

71 His<sub>10</sub>PhnD and His<sub>10</sub>nFbp were over-expressed in BL21 DE3 cells (F<sup>-</sup> ompT gal dcm lon  
72 hsdSB(rB-mB-) λ(DE3 [lacI lacUV5-T7p07 ind1 sam7 nin5]) [malB+]K-12(λS)). Cells harbouring plasmids  
73 expressing the proteins were grown in LB medium (37°C; OD<sub>600 nm</sub>=0.8) and protein overexpression was  
74 induced by IPTG (0.30 mM; for 4 hours).

75 His<sub>10</sub>CmpA was overexpressed in BL21 pLysS DE3 cells (F<sup>-</sup>, ompT, hsdS<sub>B</sub> (rB-, mB-), dcm, gal,  
76 λ(DE3), pLysS, Cm<sup>r</sup>). Cells harbouring the plasmid expressing the protein were grown (30°C; OD<sub>600 nm</sub>=0.5)  
77 and protein overexpression (growth at 16°C for 15 hours) was induced by IPTG (0.1 mM). For all proteins,  
78 growth was accomplished in Luria Bertani medium, except for CynR in which Terrific Broth was used.

79 proMalEHis<sub>6</sub> was over-expressed in BL21 DE3 cells (F<sup>-</sup> ompT gal dcm lon hsdSB(rB-mB-) λ(DE3  
80 [lacI lacUV5-T7p07 ind1 sam7 nin5]) [malB+]K-12(λS)). Cells harbouring plasmids expressing the protein  
81 were grown in LB medium (37°C; OD<sub>600 nm</sub>=0.8) and protein overexpression was induced by IPTG (1 mM;  
82 for 4 hours). 30 min prior to IPTG induction, 4mM Sodium Azide was added to the culture to inhibit SecA-  
83 dependent secretion that prevents cleavage of the signal peptide (16)

84 Proteins were purified as follows: after lysis by the cell disruptor (30.000 psi; 2 rounds), soluble  
85 material (50.000 g; 30 min; 4 °C; Sorval) was loaded (50 mM Tris-HCl, pH = 8; 1 M KCl, 10% glycerol; 10  
86 mM Imidazole; 1 mM DTT; 2 mM PMSF) on a Ni-NTA resin (Qiagen). Bound proteins were washed (50 mM  
87 Tris-HCl, pH = 8; 1 M KCl, 10% glycerol; 10 mM Imidazole; 1 mM DTT; and 50 mM Tris-HCl, pH=8; 50 mM  
88 KCl, 10% glycerol; 30 mM Imidazole; 1 mM DTT sequentially) and then eluted (50 mM Tris-HCl, pH=8; 50  
89 mM KCl, 10% glycerol; 300 mM Imidazole; 1 mM DTT). Protein fractions were pooled (supplemented with  
90 5 mM EDTA; 50 mM DTT), concentrated (Vivacell-Sartorius; Amicon-Millipore), dialyzed (50 mM Tris-HCl,  
91 pH=8; 50 mM KCl, 50% glycerol; 10 mM DTT), aliquoted and stored at -80°C.

92 For untagged CynR (Full length): after lysis by cell disruptor (30.000 psi; 2 rounds), soluble material  
93 (50.000 g; 30 min; 4 °C; Sorval) was loaded (50 mM Tris-HCl, pH = 8.3; 5 mM NaCl, 3 mM EDTA; 1 mM  
94 DTT; 2 mM PMSF) on a Q sepharose fast flow (GE Healthcare) and incubated over-night. Immobilized  
95 proteins were washed (50 mM Tris-HCl, pH 8.3, 135 mM NaCl, 3mM EDTA, 1mM DTT) and eluted (50 mM  
96 Tris-HCl, pH 8.3, 250 mM NaCl, 3mM EDTA, 1mM DTT). Protein fractions were pooled and concentrated  
97 (10.000 MWCO Amicon; Merck-Millipore) up to 5 mL and analyzed on a HiLoad 26/60 Superdex 200 (GE)  
98 (equilibrated with 50 mM Tris-HCl, pH 8.3, 5 mM NaCl, 0,1mM EDTA). Fraction were analyzed on SDS-

100 PAGE and those containing pure CynR were collected and re-subjected to Size-exclusion chromatography  
101 to increase purity (>90%). Fractions were collected, dialyzed (50 mM Tris-HCl, pH 8.0, 200 mM NaCl, 50%  
102 glycerol, 0,5 mM EDTA and 1 mM DTT), aliquoted and stored at -20°C.

103 Purification of proMalEHis<sub>6</sub> from inclusion bodies was accomplished as described previously (17).  
104 Briefly, lysed samples (30.000 psi; 2 rounds) were centrifuged (50.000 g; 30 min; 4 °C; Sorval) to separate  
105 the inclusion bodies. The pellet was solubilized (50 mM Tris-HCl, pH = 8; 100 mM KCl, 10% glycerol; 10  
106 mM Imidazole; 1 mM DTT; 2 mM PMSF; 8 M Urea) with the aid of a Dounce homogenized and centrifuged  
107 (50.000 g; 30 min; 20 °C; Sorval). The urea-solubilized pellet was diluted with (50 mM Tris-HCl,  
108 pH = 8; 100 mM KCl, 10% glycerol; 10 mM Imidazole; 1 mM DTT; 2 mM PMSF) to 6 M Urea before applying  
109 it on a Ni-NTA resin (Qiagen). Bound proteins were washed (50 mM Tris-HCl, pH = 8; 50 mM KCl, 10%  
110 glycerol; 2 mM Imidazole; 1 mM DTT; 6 M Urea and 50 mM Tris-HCl, pH=8; 50 mM KCl, 10% glycerol; 5  
111 mM Imidazole; 1 mM DTT; 6 M Urea sequentially) and then eluted (50 mM Tris-HCl, pH=8; 50 mM KCl, 5%  
112 glycerol; 300 mM Imidazole; 1 mM DTT; 6M Urea). Protein fractions were pooled (supplemented with 5 mM  
113 EDTA; 50 mM DTT), concentrated (Vivacell-Sartorius; Amicon-Millipore), dialyzed (50 mM Tris-HCl, pH=8;  
114 50 mM KCl, 10% glycerol; 10 mM DTT; 6 M Urea), aliquoted and stored at -80°C. To prevent signal peptide  
115 cleavage all purification and dialysis buffers were supplemented with 5 mM MgCl<sub>2</sub>. Prior to labelling,  
116 refolding was accomplished on the Ni-NTA resin (Qiagen) in 50 mM Tris-HCl, pH=8; 50 mM KCl, 1%  
117 glycerol; 5 mM Imidazole; 1 mM DTT by reducing the concentration of Urea progressively (6M, 5M, 4M,  
118 3M, 2M, 1M) via 5 column volume washes. After refolding, proMalEHis<sub>6</sub> was handled as MalEHis<sub>6</sub>.

### 119 120 **Protein labelling**

121 Protein labelling was accomplished as described previously (11). In brief, cysteine positions were chosen  
122 based on the open and closed x-ray crystal structures of CynR (2HXR, 3HFU), OpuAC (3L6G, 3L6H), SBD2  
123 (4KR5, 4KQP), CmpA (2I49, 2I4C), FbpA (1S11, 1S10), PhnD (3S4U, 3QUJ) and MalE (1OMP, 1ANF); *SI*  
124 *Appendix*, Table. S5. Stochastic labelling was performed with the maleimide derivative of dyes Cy3B (GE  
125 Healthcare) and ATTO647N (ATTO-TEC) for OpuAC and SBD2. CmpA, CC of CynR, FbpA, PhnD, SBD1  
126 and MalE were labelled with Alexa Fluor 555 and Alexa 647 (ThermoFischer) or AF555 and AF647 (Jena  
127 Bioscience). Histidine tagged proteins were immobilized on a Ni<sup>2+</sup>-sepharose resin (GE Healthcare) to  
128 remove the 1 mM DTT (Dithiothreitol) used to keep all cysteine residues in a reduced state. The resin was  
129 incubated 2-8 hours at 4°C with 50 nmol of each fluorophore dissolved in the appropriate buffer (50 mM  
130 Tris-HCl, pH=7.4; 50 mM KCl for CynR (CC), CmpA, FbpA, PhnD and MalE; 50 mM KPi, pH=7.4; 50 mM  
131 KCl for SBD2 and OpuAC) and subsequently washed to remove the majority of unbound fluorophores. The  
132 labelled protein was further analysed by size-exclusion chromatography (Superdex 200, GE Healthcare) to  
133 enrich the double-labelled fraction and remove potential aggregation material (18). For all proteins, labelling  
134 efficiency was higher than 80%.

### 135 136 **Isothermal titration calorimetry (ITC)**

137 Purified CynR was dialyzed overnight against 50 mM Tris-HCl, pH=7.4; 50 mM KCl. ITC experiments were  
138 carried out in a Nano ITC Low Volume (TA Instruments). The sodium azide stock solution (250 µM) was  
139 prepared in the dialysis buffer and was stepwise injected (0.5 µl) into the reaction cell containing 12 µM  
140 CynR. All experiments were carried out at 298 K with a mixing rate of 250 r. p. m. Data were analysed with  
141 a single-binding site equation, provided by the NanoAnalyse software (TA Instruments).

142 Purified CmpA was dialyzed overnight against 1X PBS Buffer that has been supplemented with 50 µM  
143 K<sub>2</sub>CO<sub>3</sub> and 1 µM EDTA. ITC experiments of CmpA were performed using MicroCal iTC200 (Malvern). The  
144 Calcium solution (500 µM) was prepared from CaCl<sub>2</sub> powder, which was subsequently diluted in the dialysis  
145 buffer and was injected (2 µl) into the reaction cell containing 40 µM of CmpA. All experiments were carried  
146 out at 280 K with a mixing rate of 750 rpm. Data were analysed with a single-binding site equation, provided  
147 by the provided MicroCal Analysis software (Malvern).

### 148 149 **Solution-based smFRET and ALEX**

150 ALEX experiments were carried out at 25-50 pM of double-labelled protein in the appropriate buffer (50 mM  
151 Tris-HCl, pH=7.4; 50 mM KCl for CynR, CmpA, FbpA, PhnD and MalE; 50 mM KPi, pH=7.4; 50 mM KCl for  
152 SBD2 and OpuAC) supplemented with additional reagents as stated in the text. For apo experiment of  
153 FbpA, 100mM of sodium citrate is added to chelate the trace of ferric. Beside 0.5 mM of ferric, excess  
154 amount of Phosphate ion (100mM) is added at saturating conditions for FbpA. The experiments were  
155 performed using a home-built confocal microscope similar to the setup described before (11) with minor  
156 modifications as outlined below. Briefly, two laser-diodes (Coherent Obis) with emission wavelength of 532  
157 and 637 nm were modulated in periods of 50  $\mu$ s and used for confocal excitation. Alternation between both  
158 excitation wavelengths was achieved by direct modulation of the two lasers. The beam of both lasers was  
159 coupled into a single-mode fiber (PM-S405-XP, Thorlabs) and collimated (MB06, Q-Optics/Linos) before  
160 entering a water immersion objective (60X, NA 1.2, UPlanSAPO 60XO, Olympus). The excitation spot was  
161 focused 20  $\mu$ m above the interface of glass and water solution. Typical average laser powers were 30  $\mu$ W  
162 at 532 nm ( $\sim$ 30 kW/cm<sup>2</sup>) and 15  $\mu$ W at 637 nm ( $\sim$ 15 kW/cm<sup>2</sup>). Excitation and emission light were separated  
163 by a dichroic beam splitter (zt532/642rpc, AHF Analysentechnik), mounted in an inverse microscope body  
164 (IX71, Olympus). Emitted light was focused onto a 50  $\mu$ m pinhole and spectrally separated (640DCXR,  
165 AHF Analysentechnik) onto two APDs ( $\tau$ -spad, <50 dark-counts/s, Picoquant) with appropriate spectral  
166 filtering (donor channel: HC582/75; acceptor channel: Edge Basic 647LP; both AHF Analysentechnik).  
167 Photon arrival times were registered by an NI-Card (PXI-6602, National Instruments). A dual-colour burst  
168 search (19) using parameters M = 15, T = 500  $\mu$ s and L = 25 was applied to identify bursts. Additional  
169 thresholding was applied to remove spurious changes in fluorescence intensity and selected for intense  
170 single-molecule bursts (total photons per burst > 150 unless otherwise mentioned). Binning the detected  
171 bursts into a 2D apparent FRET/S histogram (61 x 61 bins unless otherwise mentioned) allowed the  
172 selection of the donor and acceptor labelled molecules (20). The selected apparent FRET histograms (61  
173 x 1 bins unless otherwise mentioned) were fitted using a Gaussian function.

174 Single-molecule bursts from donor-only labelled CynR and MalE proteins were obtained by  
175 selecting the donor-only subpopulation (S > 0.9) from the 2D apparent FRET/S histogram. The total photon  
176 count per burst were normalised by its respective duration to obtain the photon count rate.

177

### 178 **Scanning confocal microscopy**

179 Confocal scanning experiments were performed using the same homebuilt confocal microscope as  
180 described before (11). Surface scanning was performed using a piezo stage with 100x100x20  $\mu$ m scanning  
181 range in XYZ, respectively (P-517-3CD with E-725.3CDA, Physik Instrumente). The detector signal was  
182 registered using a Hydra Harp 400 picosecond event timer and a module for time-correlated single photon  
183 counting (both Picoquant). Data were recorded with constant 532-nm excitation at an intensity of 0.5  $\mu$ W  
184 ( $\sim$ 125 W/cm<sup>2</sup>). Data acquisition was done with home-written Labview software (National Instruments). MalE  
185 was studied on standard functionalized cover-slides. Experiments were carried out in buffer (50 mM Tris-  
186 HCl, pH=7.4; 50 mM KCl) supplemented with 1 mM Trolox (22).

187 Time-traces were analysed by integrating the detected red and green photon streams in time-bins  
188 of 5 ms. Only traces lasting longer than 50 time-bins having on average more than 10 photons per time-bin  
189 were used for further analysis. The apparent FRET per time-bin was calculated by dividing the red photons  
190 by the total number of photons per time-bin. The most probable state-trajectory was identified by Hidden  
191 Markov Modeling (HMM) (23). For this an implementation of HMM was programmed in Matlab (MathWorks),  
192 based on previous studies (23). We assume that the FRET time-trace (the observation sequence) can be  
193 considered as a HMM with only two states having a one-dimensional Gaussian-output distribution. The aim  
194 of a HMM is to infer both the states and state-transition probabilities given the observation sequence. The  
195 Gaussian output-distribution of a state  $i$  ( $i = 1, 2$ ) is completely defined by two parameters: the average and  
196 the variance. The HMM algorithm finds all parameters  $\lambda$ , given only the observation sequence, that  
197 maximizes the likelihood function (23). This was done with the forward-backward algorithm (24). Care was  
198 taken to avoid floating point underflow and was done as described (23). The most probable state-trajectory  
199 is then found from  $\lambda$  by using the Viterbi algorithm (25). The time spend in each state is interfered from the

200 most probable state-trajectory and is summarized into a histogram for all traces under the same condition.  
201 The histogram was fitted with a single exponential decay to obtain the closing rate and closed-state lifetime.  
202

### 203 **Hydrogen/Deuterium exchange Mass Spectrometry (HDX-MS)**

204 *Isotope labeling:* MalE and derivative MalE (M321K) were incubated for 30 min at 25°C [5  $\mu$ l of 28.25  $\mu$ M  
205 protein stock in 50 mM Tris-HCl pH 7.4, 50 mM KCl to ensure saturation and to thermally equilibrate the  
206 samples. At 30 min of incubation, MalE was isotopically labeled with 93.75% v/v final D content at 25°C, by  
207 addition of 75  $\mu$ l deuterated buffer [50 mM Tris-DCI pD 7.4, 50 mM KCl in D<sub>2</sub>O (D<sub>2</sub>O, 99.9% atom D; Euriso-  
208 top)] for 10, 100, 1000, 10000 and 100000 sec. pD refers to the corrected value for the isotope effect. The  
209 HDX reaction was quenched at the defined time intervals by instant acidification [pD 2.5; formic acid; (Ultra-  
210 pure) from Merck KGaA]. The pre-chilled quenching solution contained urea (Urea-d<sub>4</sub>; Sigma) to a final  
211 concentration of 1.6 M at quenching to increase the peptide coverage by mild denaturation. 50 pmoles of  
212 protein were injected for analysis.

213 The CC of CynR (92-298) and the tetrameric DNA-free CynR (1-298) (isolated by SEC) were  
214 concentrated to 28.6  $\mu$ M and supplemented with 5 mM DTT. CynR (4  $\mu$ l; 28.6  $\mu$ M) was incubated at 25°C  
215 for 30 min in the presence or absence of NaN<sub>3</sub>, by addition of 1  $\mu$ l of 0.5 M NaN<sub>3</sub> diluted in 50 mM Tris-HCl  
216 pH 7.4, 50 mM KCl. For the apo states, 1  $\mu$ l of buffer was added instead. Deuterated buffer (95  $\mu$ l; as for  
217 MalE) was added for 10, 100, (1000/ 2000 for the CC and CynR respectively), 10000 and 100000 (for the  
218 CC) sec at 25°C, resulting in 95% v/v D<sub>2</sub>O, 1.14  $\mu$ M FL CynR, 5 mM NaN<sub>3</sub>. The isotope labeling reactions  
219 were quenched by acidification (pD<sub>corrected</sub> 2.5) with pre-chilled quenching solution containing urea (Urea-  
220 d<sub>4</sub>; Sigma) to a final urea concentration of 1.52 M (0.73  $\mu$ M protein). The samples were instantly frozen in  
221 liquid nitrogen and analyzed by instant thawing within two days of preparation. 36 pmoles of protein were  
222 injected for analysis.

223 For the analysis of the DNA-bound CynR, a different approach was followed to minimize the signal  
224 suppression during the mass spectrometric analysis induced by the addition of DNA. Specifically, FL CynR  
225 (2  $\mu$ l; 32.85  $\mu$ M protein; 5 mM DTT) was supplemented with 1.2 molar excess of DNA in H<sub>2</sub>O (1.8  $\mu$ l of  
226 43.99  $\mu$ M) and incubated at 25°C for 5 min prior to addition of 0.6  $\mu$ l of 0.5 M NaN<sub>3</sub> (in H<sub>2</sub>O) for the liganded  
227 state, or with 0.6  $\mu$ l of nanopure H<sub>2</sub>O for the apo state. The dilution of Tris and KCl concentrations by  
228 addition of H<sub>2</sub>O at this step was corrected by increased their concentrations in the protein stock. The  
229 samples were incubated for an additional 25 min at 25°C prior to addition of deuterated buffer (55.6  $\mu$ l; as  
230 above) for 10, 1000, 10000 sec at 25°C, resulting in 92.7% v/v D<sub>2</sub>O, 1.1  $\mu$ M CynR, 1.3  $\mu$ M DNA, 5 mM  
231 NaN<sub>3</sub>. The isotope labeling reactions were quenched by acidification (pD<sub>corrected</sub> 2.5) with 4.2 excess of pre-  
232 chilled quenching solution containing deuterated urea to a final concentration of 1.52 M (250  $\mu$ l total volume  
233 of quenched reaction; 0.26 $\mu$ M CynR; 0.32 $\mu$ M DNA) and loaded on centrifugal concentrators (Vivaspin 500;  
234 10,000 MWCO PES, Sartorius). The quenched samples were concentrated to 60  $\mu$ l by centrifugation at  
235 20,000xg for 2 min (Sigma 1-16K). Due to the linear nature of DNA, it is not retained in the centrifugal  
236 membrane and therefore only the protein is concentrated (1.1  $\mu$ M CynR; 0.32 $\mu$ M DNA). The retained  
237 solution in the centrifugal apparatus was transferred to a pre-chilled tube and was frozen in liquid nitrogen.  
238

239 *Online proteolysis-LC-MS analysis:* The quenched samples were injected into a nanoACQUITY UPLC  
240 System with HDX technology (Waters, UK), thermostated at the digestion and LC separation chambers at  
241 20°C and 0.8°C (2°C for CynR) respectively. Proteolytic digestion (Enzymate BEH pepsin column, Waters)  
242 and peptide trapping/desalting (ACQUITY UPLC R BEH C18 VanGuard pre-column; 130 Å, 1.7  $\mu$ m, 2.1 x  
243 5 mm; Waters) were performed with 0.23% formic acid in H<sub>2</sub>O (Solvent A) at 100  $\mu$ l/min for 3 min, online  
244 with peptic peptide separation (ACQUITY UPLC R BEH C18 analytical column; 130 Å, 1.7  $\mu$ m, 1 x 100 mm;  
245 Waters) at 40  $\mu$ l/min using a 12 min (8 min for CynR) linear gradient from 5% to 50% Solvent B [ACN  
246 (Optima LC/MS grade; Fischer Scientific), 0.23% formic acid]. The eluate was analyzed online on a Synapt  
247 G2 ESI-Q-TOF instrument (Waters, UK) with a MassLynX interface (version 4.1 SCN870; Waters) for data  
248 collection. The source/TOF conditions were set as: resolution mode, capillary voltage 3.0 kV, sampling

249 cone voltage 20 V, extraction cone voltage 3.6 V, source temperature 80°C, desolvation gas flow 500 L/h  
250 at 150°C. The deuterated samples were analyzed in MS acquisition mode (300-2000 Da range), while for  
251 peptide identification non-deuterated samples (treated as above but in protiated buffers) were analyzed in  
252 MS<sup>E</sup> acquisition mode over the m/z range 100-2,000 Da, using a collision energy ramp from 10 to 30 V.  
253 Leucine Enkephalin (2 ng/μl in 50% ACN, 0.1% formic acid; 5 μl/min) was co-infused in both acquisition  
254 modes for accurate mass measurements (reference mas: m/z 556.2771).  
255

256 *Data analysis:* For peptide identification, MS<sup>E</sup> data were processed on the ProteinLynx Global Server  
257 (PLGS v3.0.1, Waters, UK), using a user-defined database containing MalE, MalE (M321K), the CC CynR  
258 and CynR sequences under the following criteria: digestion enzyme, non-specific; false discovery rate, 4%,  
259 minimum fragment ion matches/peptide and /protein, 3 and 7; minimum peptide matches/protein, 1; low  
260 and elevated energy thresholds, 150 and 25 counts; intensity threshold: 500 counts, reference mass  
261 correction window, 0.25 Da at 556.2771 Da/e. The identified peptides from two independent MS<sup>E</sup> raw files  
262 were further filtered on the DynamX software (version 3.0, Waters) for DynamX score > 7.5 (7 for CynR),  
263 maximum MH<sup>+</sup> error of 5 ppm and minimum products/amino acid of 0.2. Only robustly identified peptides  
264 in both replicates were further processed, resulting in 94.3, 93.8%, 93.4% and 88.3% sequence coverage  
265 for MalE, MalE (M321K), the CC CynR and full-length CynR respectively. Deuterium uptake was  
266 determined using the DynamX software. For the comparison of the WT and MalE (M321K) at the mutated  
267 region, the peptide containing residues 321-337 was compared only at the level of D-uptake relative to the  
268 full deuteration of each state, after complete analysis of each protein with its individual controls, and not at  
269 the level of absolute D-uptake. For this, MalE (M321K) was analyzed using the peptide list created from the  
270 MalE (M321K) sequence, the MalE (M321K) non-deuterated and full deuterated controls (*Dataset S5-Table*  
271 *F5B*). Additionally, for the comparison of MalE (M321K) at the apo state, statistical analysis was performed  
272 both on the data analyzed using the WT and MalE (M321K) sequence in order to include the mutated region  
273 (*Dataset S5-Tables F5B, F5C, F5D*).  
274

275 *Statistical analysis:* All HDX reactions were performed in triplicates, unless otherwise indicated (*Dataset*  
276 *S5-Table F5A, F4A, F4B, F4C*). Statistical analysis of the significance of differences between the apo and  
277 liganded states, and between the WT and MalE (M321K) mutated sequence in the case of MalE, was  
278 achieved using a modified approach of Bennett *et al.*, (26), described in Tsirigotaki *et al.*, (27, 28). Briefly,  
279 two-tail paired t-tests, comparing the mean uptake, as absolute deuterium uptake values, of the two states  
280 for each peptide, were performed using R language and the significance threshold was set to 99%  
281 confidence (1-p≥0.99). An additional threshold was set at ±4SD of average pooled standard deviations of  
282 both states. Finally, a third criterion was introduced to exclude false positives due to high SD outliers that  
283 are averaged out in the pooled SDs: The difference between the two states for each peptide must exceed  
284 twice the sum of SDs of the two states for the given peptide. Only differences that fulfill all three criteria  
285 were considered as statistically significant. Visualization of the statistical analysis in scatter plots was  
286 achieved by R language (*Dataset S5-Table F5D* and *Dataset S4-F4A, F4B* and *F4C*). For optimal  
287 realization of the extent of the ΔD-uptake regardless of the length of the identified peptides, the ΔD-uptake  
288 of each peptide was expressed relative to the experimentally determined full deuteration control (normalized  
289 ΔD-uptake). For higher robustness, only statistically significant differences that exceeded the absolute value  
290 of 10% normalized ΔD-uptake are discussed. Detailed data sets including smaller, statistically significant  
291 differences are given in *Dataset S5-Tables F5C* (for WT and MalE (M321K) apo states), *Dataset S5-Table*  
292 *F5E* (for WT MalE apo and holo states), *Dataset S4-F4A* (for DNA-bound CynR apo and holo states),  
293 *Dataset S4-F4B* (for DNA-free CynR apo and holo states) and *Dataset S4-F4C* (for the CC CynR apo and  
294 holo states).  
295

### 296 **Bulk Fluorescence measurements**

297 Measurements were carried out in quartz cuvettes (1 ml; Hellma) with a Cary Eclipse fluorimeter  
298 supplemented with a four-position cuvette holder and a Peltier temperature controller (Varian). To

299 determine an apparent melting temperature  $T_m$  (apparent), the changes in intrinsic tryptophan fluorescence  
300 emission of CynR (0.3  $\mu$ M) as a function of increasing temperature (10 - 70  $^{\circ}$ C; ramping rate 0.8  $^{\circ}$ C/min;  
301 excitation 297 nm/emission 345 nm; slits at 2.5 and 20 nm; data acquisition interval = 0.5 min), in the  
302 presence or absence of NaN<sub>3</sub> (1 mM). All data were collected using Cary Eclipse software (Bio Package;  
303 Varian) and analyzed by nonlinear regression using Origin 5.0 (Microcal).

304

#### 305 **Homology modelling method**

306 For establishing the three-dimensional structure and the different oligomeric states of CynR, its amino acid  
307 sequence has been modelled according to known structures having a substantial degree of sequence  
308 similarity that were used as templates (29). The amino acid sequence of CynR was submitted to the SWISS-  
309 MODEL in the Automated Protein Modelling server provided by the Glaxo Smith Kline center (Geneva,  
310 Switzerland) using the standard settings of the server (30). All models were reliable according to server  
311 thresholds (31-33).

312

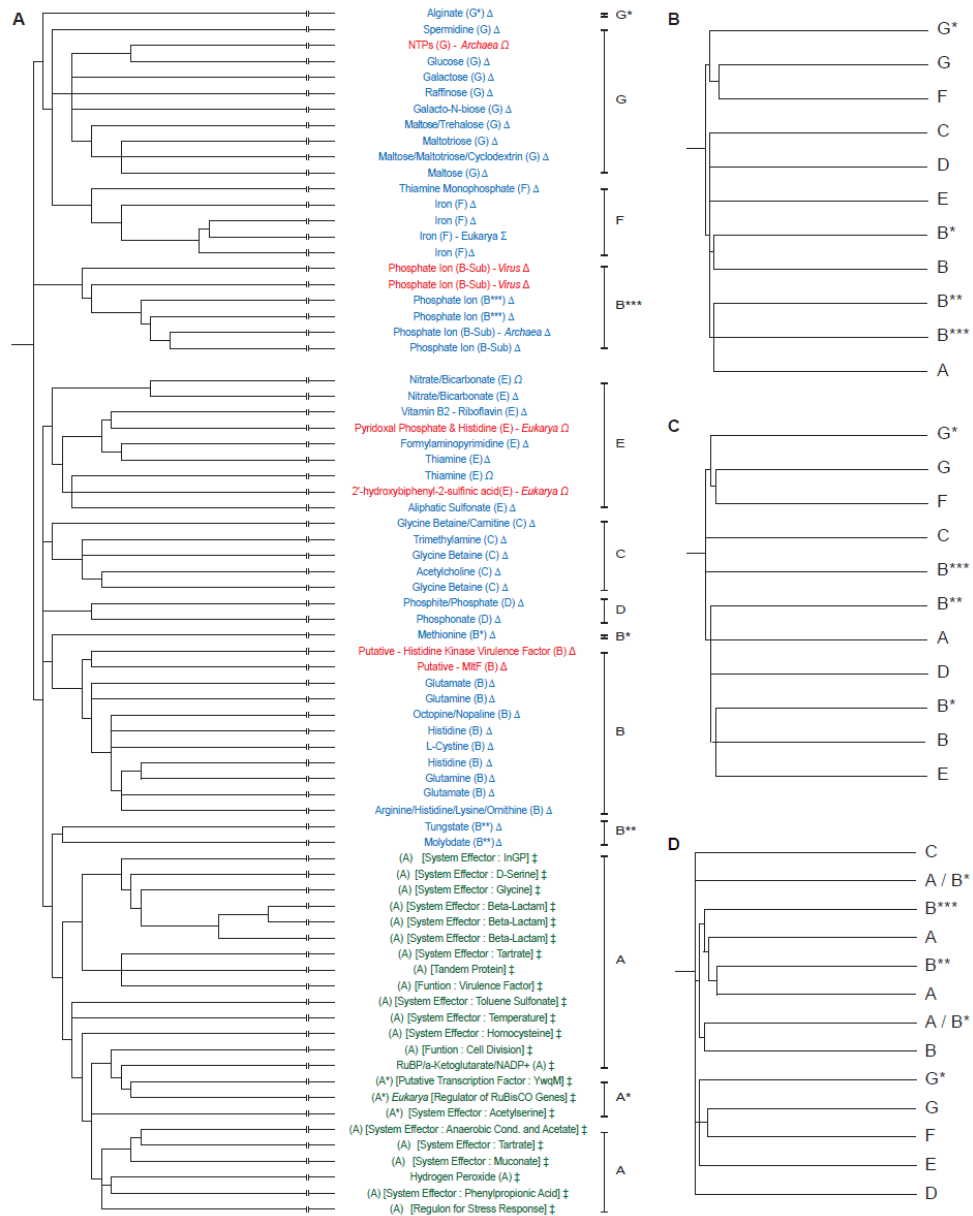

314  
 315 **Figure S1.** Phylogenetic Trees of *cherry-core* proteins (CCPs); related to Fig. 1C. (A) Summarized sequenced-based  
 316 extended phylogenetic tree of the bilobed CCPs, grouped with respect to their ligands. Complete tree of ~ 600 proteins  
 317 is shown in *Dataset S1*. Function was obtained from UniProtKB (34) and is color-coded (Green: transcription factors;  
 318 Red: enzymes; Blue: substrate binding proteins). Localization is denoted by a symbol (‡: DNA-bound; Δ: extracellular;  
 319 Ω: cytoplasm; Σ: chloroplast). Ligands or system effectors are indicated and chemical structure is presented in *SI*  
 320 *Appendix*, Fig. S3. (B-D) Summarized (complete trees in *Dataset S2*) sequence-based phylogenetic trees of the 53  
 321 identified CCPs with known structures for the entire polypeptide chain (B), for D1, D2 (C), and for the C-tail only (D).  
 322 An asterisk (\*) marks structural subclasses (see *Dataset S3*). A similar clustering is observed in all above trees and  
 323 comparable to the structure-based phylogenetic tree (Fig. 1C). This indicates that proteins having a class-specific rigid  
 324 domain (D1 and D2) have evolved to have the class-specific C-tail. This outcome is in line with the fact that the C-tail–  
 325 domain interactions stabilize a specific (open) structural state (Fig. 2 and *SI Appendix*, Table. S2). Two major clades  
 326 are encountered in the structure-based phylogenetic trees (Fig. 1C). The ‘lower clade’, which includes classes F and  
 327 G, manifest substantial alterations of the CC, represented primarily by insertions of secondary structure elements (see  
 328 also Fig. 1D and *SI Appendix*, Fig. S2). On the other hand, the ‘upper clade’ includes CCPs with minor  
 329 alterations/variability of their CC.



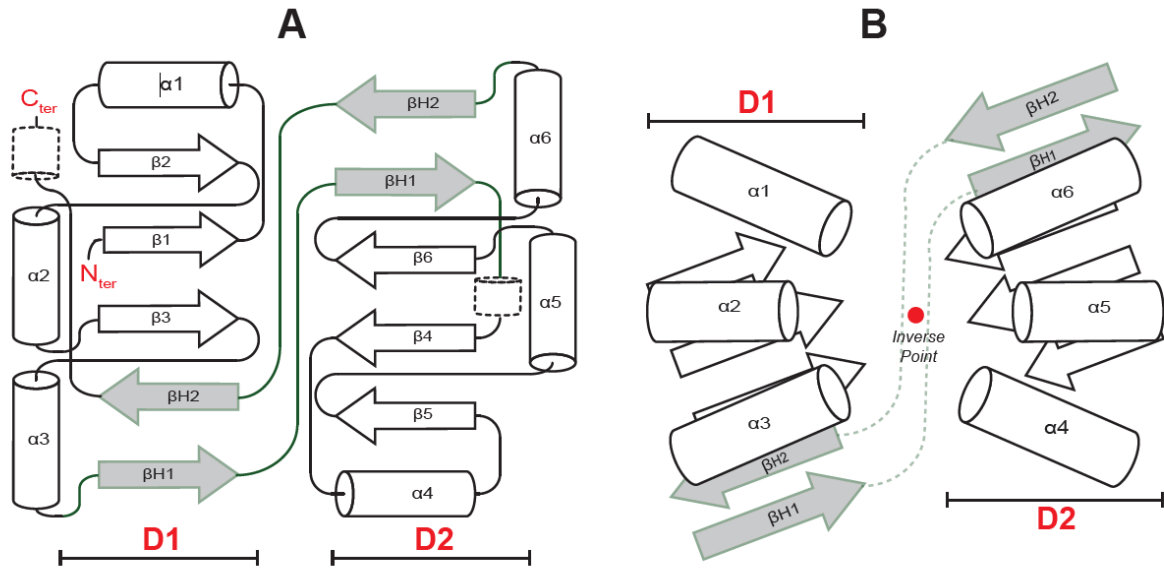

331  
 332  
 333  
 334  
 335  
 336  
 337

**Figure S2.** Structural Consensus of *cherry-core* proteins; related to Fig. 1B-D. (A) Consensus/model derived from secondary structure alignments of the CC of CCPs (Fig. 1D and *Dataset S3*). (B) Schematics of the geometrical consensus for the 3D placement of secondary structure elements originated from the 3D Structural analysis (manually inspected by Pymol). The unique placement of such elements in the 3D space provides a remarkable degree of symmetry of D1 & D2 of the CCPs forming the binding site.

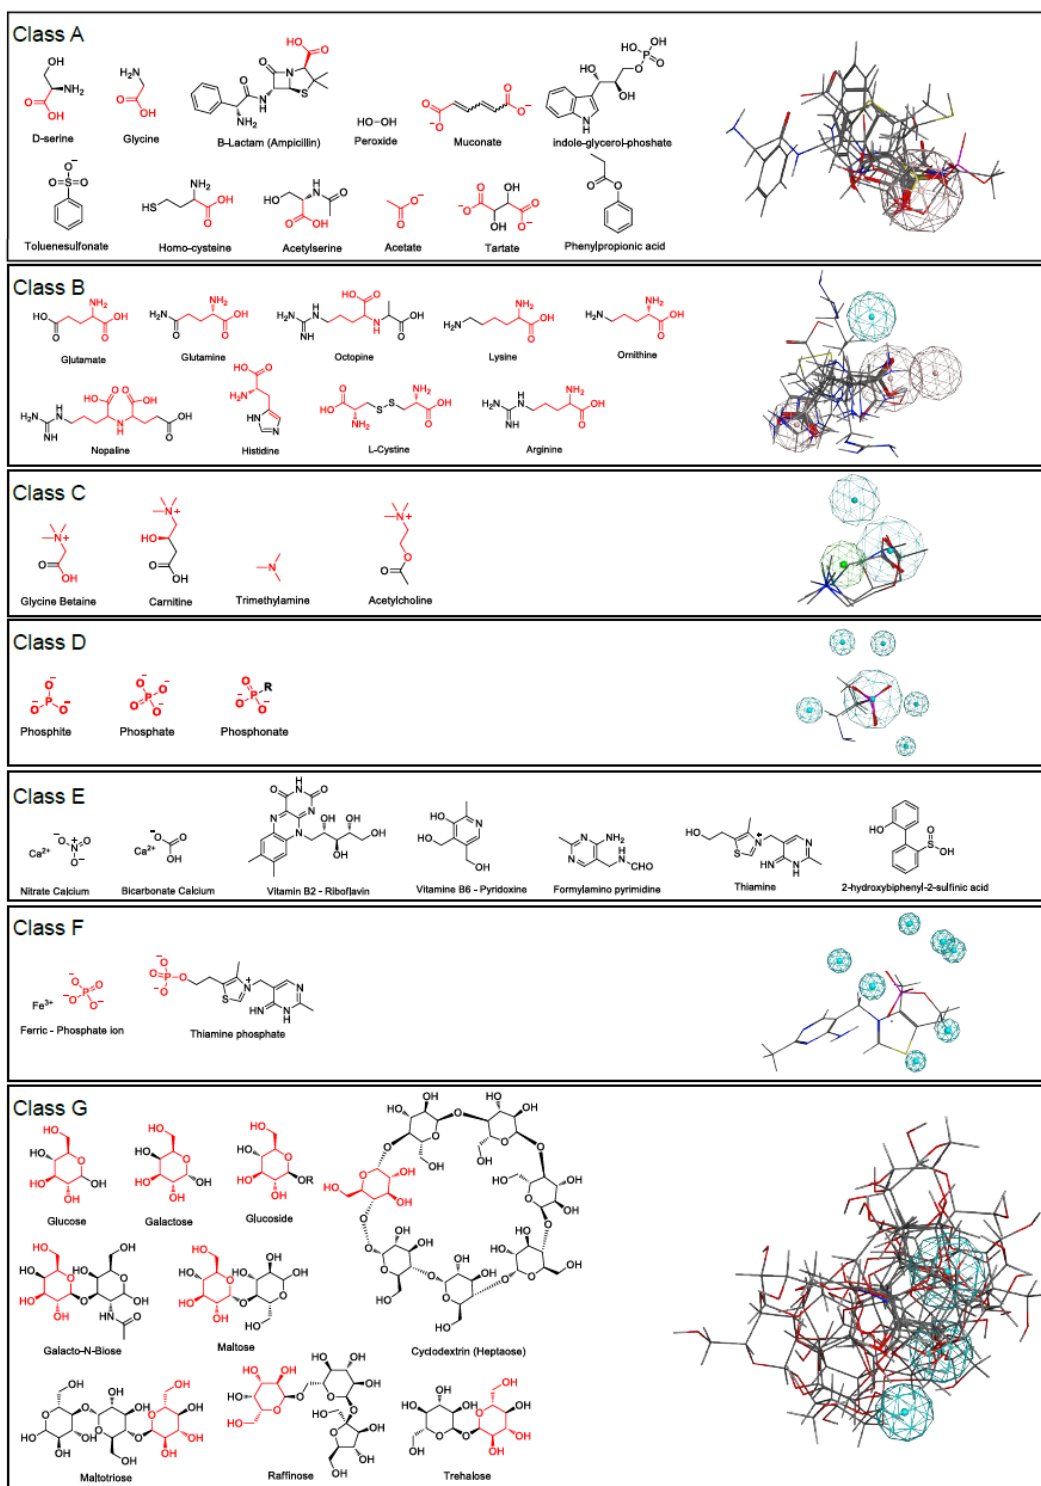

338  
 339 **Figure S3.** Common Chemical Structure and pharmacophore structure of the cherry-core protein ligands; related to  
 340 Figure 2. The common chemical structure of all identified ligands for each of the CCP classes (A-G) is highlighted with  
 341 red color. The ligands of class A, but mostly class E do not share a substantial degree of a chemical structure. In  
 342 addition, pharmacophore analysis after flexible alignment (by using the MOE software) of the ligands for every class,  
 343 reveals the common interactions which are represented with brown (hydrogen bond donor-acceptor, HBD-A), blue  
 344 (hydrogen bond acceptor, HBA) or green (lipophilic) spheres. Specifically, class A shares 1 interaction (HBD-A); class  
 345 B, 4 interactions (3 HBD-A and 1 HBA); class C, 3 interactions (2 HBA and 1 lipophilic); class D, 6 interactions (HBA);  
 346 class E, 0 interactions; class F, 7 interactions (HBA) and class G, 3 interactions (HBA).

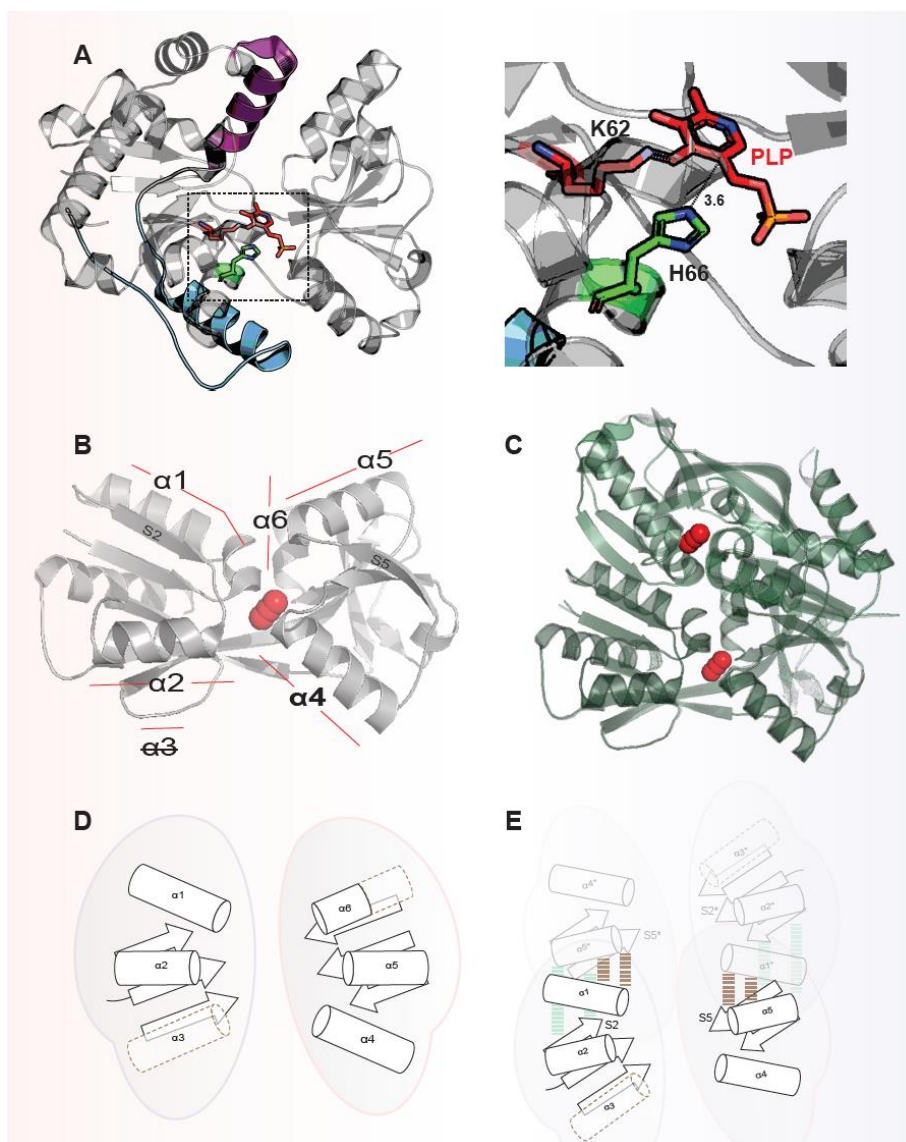

347  
 348  
 349 **Figure S4.** Structural analysis of the single-turnover enzyme pyrimidine synthase THI5p and of the oligomeric  
 350 transcription factor CynR, related to Fig. 2 and Fig. 4. (A) Crystal structure (PDB:4ESX) of the single-turnover enzyme  
 351 thiamin pyrimidine synthase (35) in complex with its ligand pyridoxal phosphate (red sticks). The 2 symmetric helices  
 352 of the C-tail that stabilize the cleft in the closed state and render it rigid, are colored as in Fig. 2. The extreme rigidity  
 353 required is evidenced by the fact that pyridoxal phosphate needs to bind to the cleft of the pyrimidine synthase of *C.*  
 354 *albicans* with a very specific geometry (provided also by the covalent interaction with K62, forming a Schiff base) with  
 355 respect to the side chain of H66 (green sticks). This allows the “remarkable” chemistry to occur, as stated by the authors  
 356 of the corresponding paper. The reaction consists of the excision of the side chain of H66 to produce thiamine  
 357 pyrimidine. (B) Crystal structure of the *holo* state of the CC of CynR (PDB: 3HFU) with azide (indicated with red spheres)  
 358 in the binding cleft. For clarity, the second protomer present within the asymmetric unit was omitted. (C) The *holo* state  
 359 of the CC CynR (PDB: 3HFU, grey color) was superimposed with the *apo* CC CynR (PDB: 2HXR, green color). The  
 360 dimeric assembly was classified to be biologically relevant by EPPIC. Both the protomer structure, and the dimeric  
 361 assembly do not undergo significant structural changes and are perfectly super-imposable. (D) Schematic  
 362 representation of the CC of CynR. The conserved CC helix (*SI Appendix*, Fig. S2)  $\alpha3$  is missing from the CC of CynR  
 363 and all class A proteins (Fig. 1D and *Dataset S3*). (E) Schematic representation of the dimeric CC of class A proteins.  
 364 Interacting secondary structure elements are highlighted.  $\alpha1$  makes hydrophobic contacts with S5 and  $\alpha5$ , while S2  
 hydrophobic contacts with  $\alpha5$  and hydrophobic contacts/hydrogen bonds with S5.

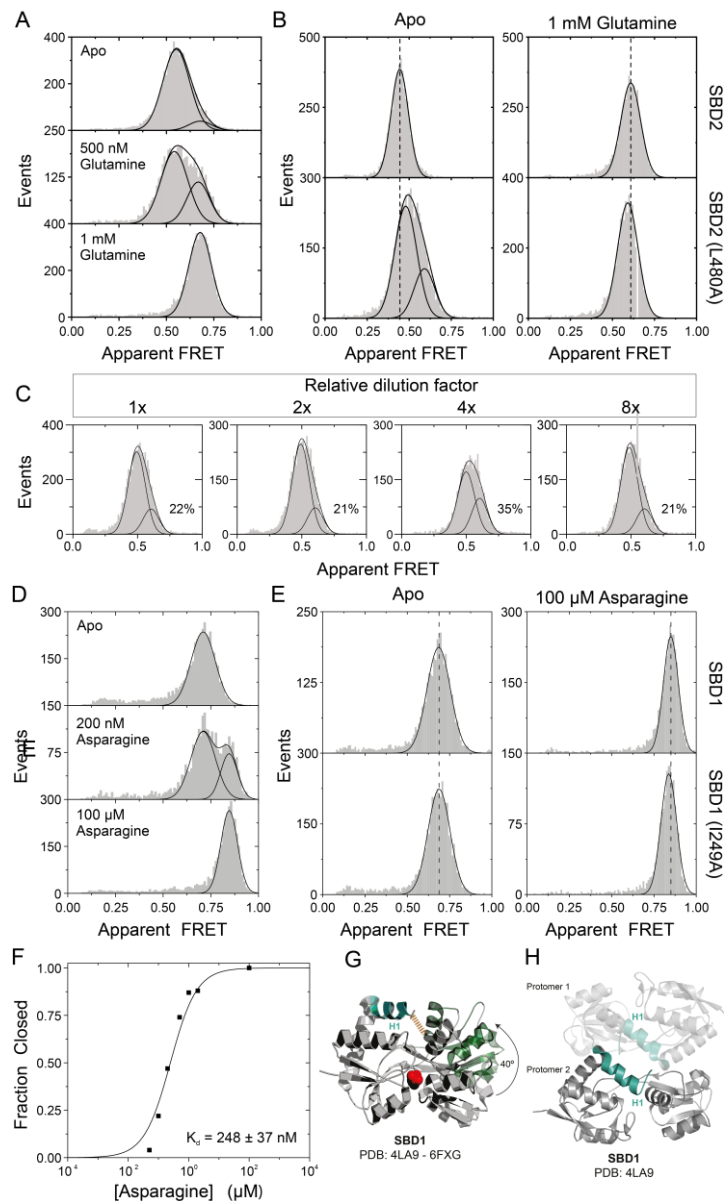

365  
 366 **Figure S5.** Structural dynamics of SBD2, SBD1, and derivatives, related to Fig. 5. (A) Apparent FRET efficiency  
 367 histogram of freely diffusing SBD2 (L480A) labelled with the donor fluorophore Alexa Fluor 555 and acceptor  
 368 fluorophore Alexa Fluor 647. The fraction of closed state is similar as found for SBD2 (L480A) labelled with the donor  
 369 fluorophore Cy3B and the acceptor fluorophore Atto647N, as presented in Fig. 5C. (B) The apparent FRET efficiency  
 370 peak for both the *apo* (open) and *holo* (closed) state of SBD2 (L480A) is found to differ slightly from SBD2, which would  
 371 suggest that the energy landscape is altered. (C) To exclude that the presence of endogenous ligand is responsible for  
 372 the fraction closed observed, FRET efficiency histograms were measured under different sample concentrations. By  
 373 diluting the sample, the ligand concentration would decrease, and hence the fraction of closed observed should  
 374 decrease if it was due to ligand contamination. These results show no change in fraction closed over almost a 10-fold  
 375 increase in dilution, indicating that the fraction closed is not caused by endogenous ligand. (D) Apparent FRET  
 376 efficiency histograms of freely diffusing SBD1 (I249A) labelled with the donor fluorophore AF555 and acceptor  
 377 fluorophore AF647. Here, no fraction closed is present in the absence of ligand. (E) The apparent FRET efficiency peak  
 378 for the *apo* (open) state of SBD1 (I249A) is found to be identical as for SBD1, and for the *holo* (closed, 100 μM  
 379 asparagine) state only a minor shift ( $\sim 0.01$ ) is found, which would suggest that the mutation I249A does not alter the  
 380 energy landscape of SBD1. (F) Fraction of the closed state (high FRET state) of SBD1 (I249A) as a function of  
 381 asparagine concentration. The  $K_d$  of 248 nM is similar to what has been found before for SBD1. (G) The *apo* and *holo*  
 382 structures of SBD1 where superimposed as in Fig. 2. (H) The protomer arrangement in the open SBD1 structure (4LA9).  
 383 The dimerization interface involves uniquely H1, as indicated. The inter-protomer contacts impact the intra-protein  
 384 stabilizing open state interactions of SBD1 (compare SBD1 vs SBD2 contacts in SI Appendix, Table. S2).

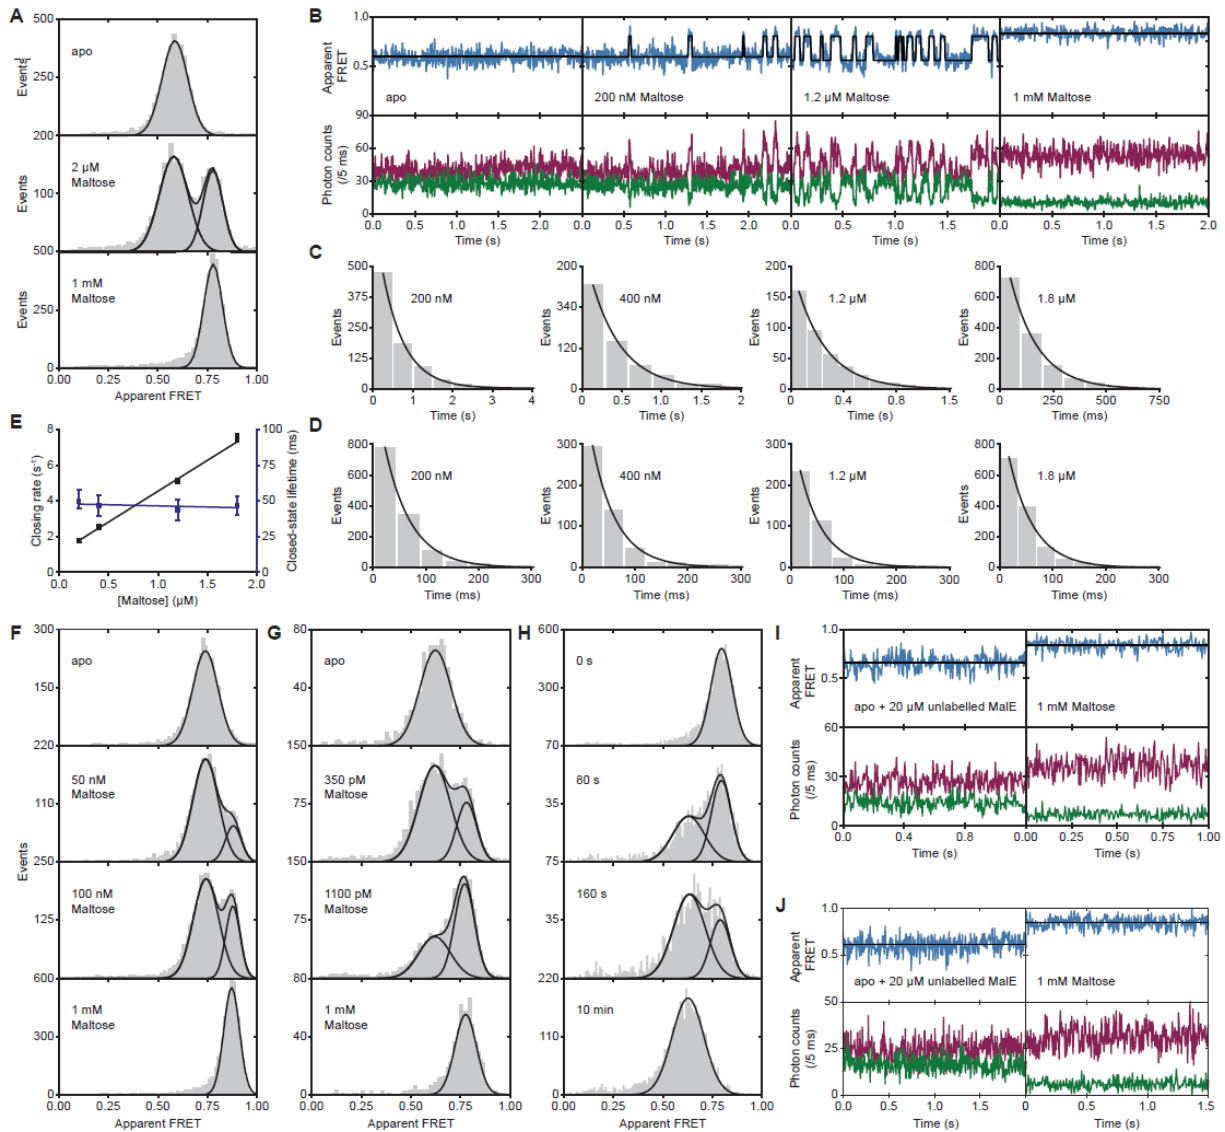

385  
 386  
 387 **Figure S6.** Structural dynamics of MalE and derivatives; related to Fig. 5 E-I. (A) Apparent FRET efficiency histogram  
 388 of MalE, obtained from the solution-based smFRET and ALEX measurements under conditions as indicated. (B)  
 389 Fluorescence trajectories of MalE under different conditions as indicated; donor (green) and acceptor (red)  
 390 photon counts are binned with 5 ms. The top panel shows calculated apparent FRET efficiency (blue) with the most probable  
 391 state-trajectory of HMM (black). (C, D) Waiting time distribution of the low (C) and high FRET state (D) as obtained  
 392 from the most probable state-trajectory of the HMM of all molecules per condition. Grey bars are the binned data and  
 393 the solid line is the fit. (E) Mean closing rate (black) and closed-state lifetime (purple) as function of maltose  
 394 concentration obtained from the fits in (C) and (D). Error bars indicate the 95% confidence interval of the fit obtained  
 395 from the fit in (C) and (D). (F, G) Apparent FRET efficiency histogram of MalE (M321A) (F) and MalE (M321K) (G). (H)  
 396 Time dependence of apparent FRET efficiency histograms of MalE (M321K) in the presence of 10 nM maltose and 20  
 397  $\mu\text{M}$  unlabeled MalE (M321K) added to scavenge all maltose. First 10 nM maltose was added to saturate the protein  
 398 (top panel). Subsequently  $\sim 20 \mu\text{M}$  unlabeled protein was added to scavenge all ligands that are released from the  
 399 labelled protein. Protein conformation was probed at indicated time points. Grey bars are the data and solid line is the  
 400 fit. (I, J) Fluorescence trajectories of MalE (M321A) (I) and MalE (M321K) (J) obtained from surface immobilized  
 401 molecules in the apo ( $\sim 20 \mu\text{M}$  unlabeled protein) or 1 mM maltose conditions. Fluorescence trajectories of MalE  
 derivatives are plotted similarly to (B).

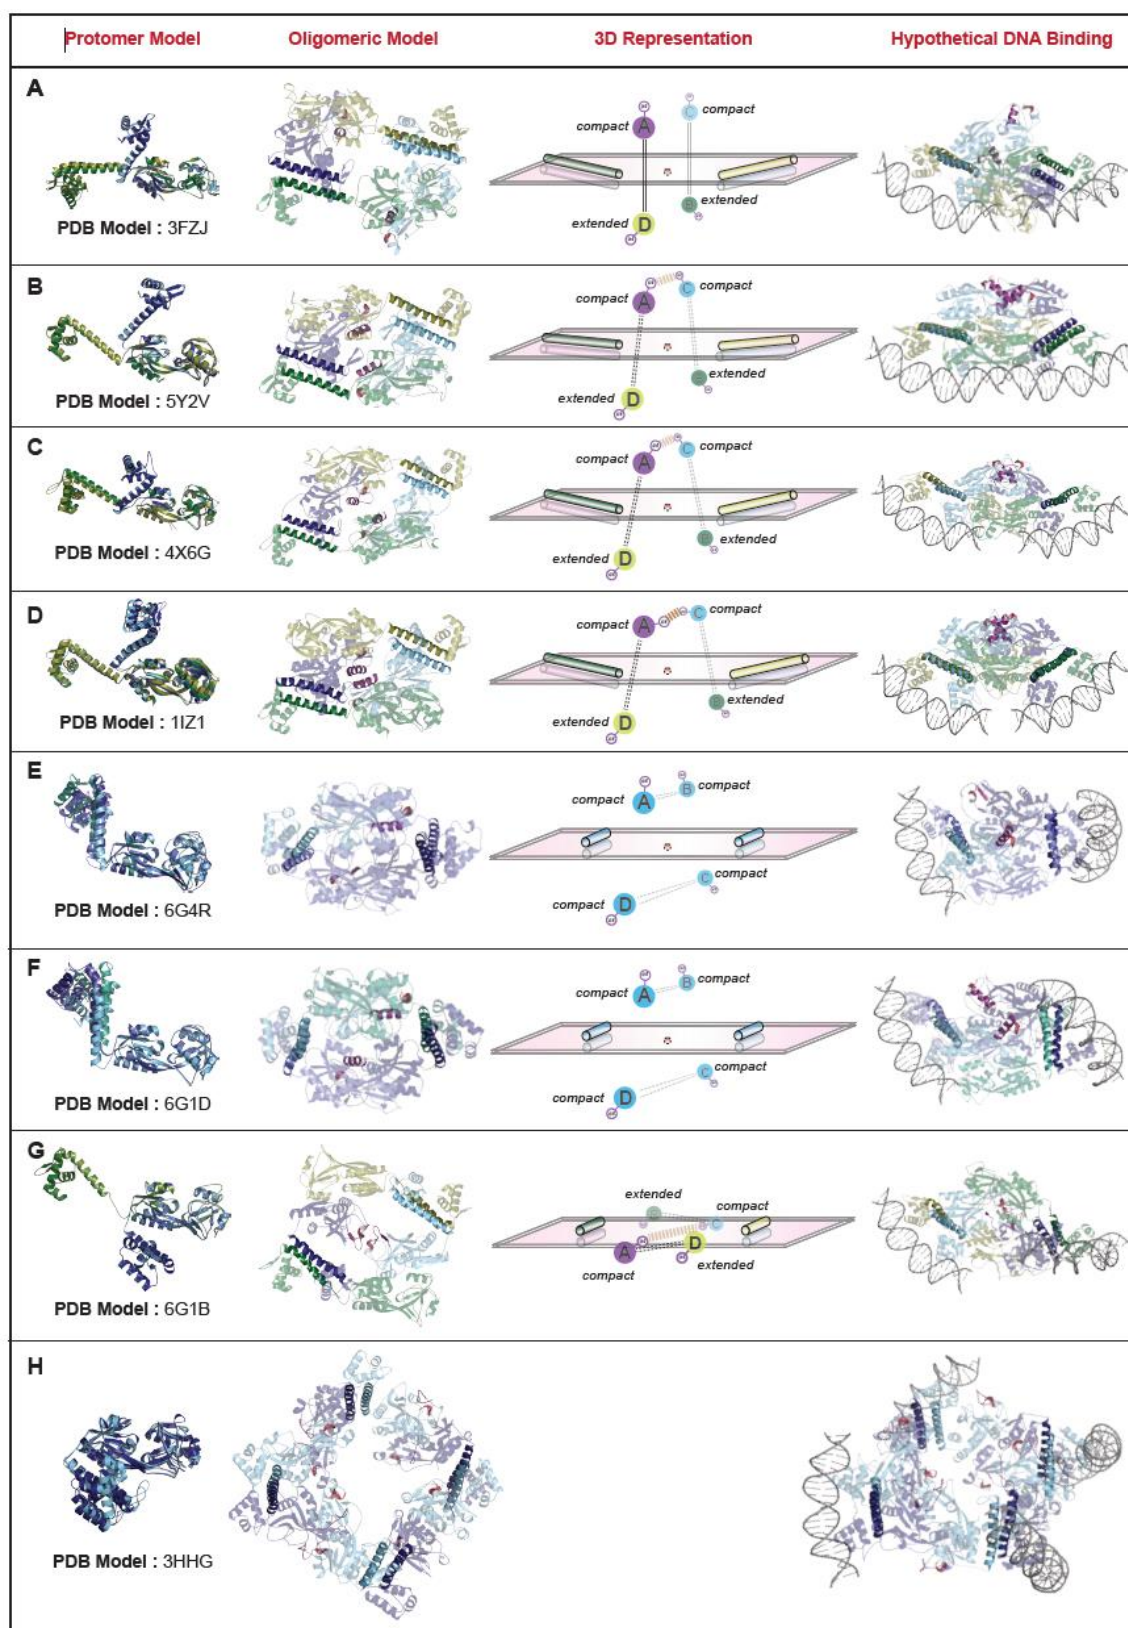

402  
403  
404  
405  
406

**Figure S7.** Models of Oligomeric States of CynR, related to Fig. 4. The CynR sequence (UniprotKB: P27111) was modelled from the indicated PDB structures that were used as a template, by the SWISS-MODEL server. The DNA in all structures was modelled from the structure of the HTH-DNA binding domain of CbnR in complex with the RBS of the *cbnA* promoter (36). **(A-D)** Each tetramer is a dimer of dimers. The dimerization interface is formed by the long  $\alpha$ -

407 helix connecting the CC to the DNA binding domain (see also Fig. 4A, B). The  $\alpha$ -helical coil-coil is stabilized always  
408 (i.e. in all known high-resolution structures of the HTH-motif transcription factors) by hydrophobic interactions. In one  
409 of the protomers, the helix is present in a compact configuration (i.e. it bends toward the CC), while in the other it is  
410 extended. The compact dimers are always represented by cold colors (blue-cyan), whereas the extended with warmer  
411 colors (green, yellow). The tetramerization interface is provided by two antiparallel CCs (*SI Appendix*, Fig. S4B-E), one  
412 of them in the compact and the other in the extended configuration. By superimposing the CC of all protomers, we  
413 notice differences in the arrangement of the dimerization helix with respect to the CC between the compact or the  
414 extended protomers. This is clearly evident in the contact map (*Dataset S7*) of the protomers depicting the interactions  
415 between the dimerization helix and the CC, as such interactions vary even between the protomers having the same  
416 arrangement (either compact or extended). The dimerization helices are in the same plane, forming an intelligible  
417 rectangle, indicated in the 3D representation column. The two compact dimers are in one side on the rectangular plane,  
418 whereas the other two extended on the other (**3D Representation Column**). In some assemblies (4X6G and 6G1B),  
419 the quaternary structure is stabilized via interactions between secondary structure elements belonging to the compact  
420 dimers. Such elements ( $\alpha 4$  and CH2, see *Dataset S3*) are colored with pink and magenta color respectively in all  
421 assemblies. The DNA is always present on the side of the two extended protomers. (E, F) In these oligomers, all  
422 protomers are in the compact configuration, thus colored with cold colors. The DNA runs parallel to the intelligible  
423 rectangle denoting the plane of the dimerization helices. (G) Here two of the protomers are in the compact and two in  
424 the extended configuration alike A-D. The difference is that in the compact protomers the loop connecting the  
425 dimerization helix to the CC is rotated  $180^\circ$  with respect to the compact protomers of **A-D**, placing the DNA binding  
426 domain below the CC. In this case all CCs are in the same plane with that of the dimerization helices. (H) Here, all  
427 protomers are in the compact configuration, alike the compact protomers of panel G. With such an arrangement, an  
428 octameric assembly is formed. It has been verified that the octameric form is indeed the predominant form by native  
429 mass spectrometry and analytical ultracentrifugation (37). Strikingly, the quaternary assemblies presented in panels E,  
430 F, and G derive from the same protein at different conditions (*apo* vs. *liganded*, see also Discussion for details) (38).  
431 Such structures indicate that the quaternary assembly that dictates DNA bending depends on the orientation of the  
432 dimerization helix with respect to the CC. No large domain motions of the D1-D2 of the protomers are observed in such  
433 quaternary assemblies (*SI Appendix*, Table. S4). The differences between the protomers of these assemblies involve  
434 minor rearrangements of secondary structure elements and partial loss of secondary structure (in *Dataset S3* denoted  
435 with a black rectangle). Moreover, such high-resolution data highlight the remarkable flexibility of the transcription  
436 factors, as the same protomer can obtain multiple conformations: two distinct compact configurations with the DNA  
437 binding domain either above or below the CC and even an extended configuration. There is even additional variability  
438 within the apparently similar compact and extended configurations (*Dataset S7*). Moreover, the prominent octameric  
439 population found for 6G1B (37) (panel G) indicates that all of the protomers could also obtain the compact form of  
440 3HHG (panel H). Only the compact form of 3HHG satisfies the geometrical criteria to obtain an octameric assembly.  
441 This remarkable flexibility is also substantiated by inspecting the contact map of the CynR models based on the different  
442 oligomeric assemblies (*Dataset S7*). Such interaction map indicates that the dimerization helix could obtain multiple  
443 arrangements with respect to the CC of CynR in the different protomers, yielding multiple quaternary arrangements (A-  
444 H). This agrees with our HDX-MS results demonstrating that the dimerization helix and the DNA binding domain are  
445 extremely flexible (Fig. 4D). The 3HHG octameric assembly is unique, as all other known LysR transcription factors are  
446 tetramers. Our phylogenetic tree indicated that this structure separates from all the rest in the first clade (*Dataset S6*).  
447 Moreover, the phylogenetic tree based uniquely on the CCs provides the same results. This means that the  
448 "information" for obtaining an octamer (i.e. all protomers in the compact orientation) resides within the CC. By inspecting  
449 the structure-based sequence alignment, we noticed that 3HHG has two differences compared to all other CCPs (*SI*  
450 *Dataset S3*): the additional helix CH5 connecting Hinge- $\beta$ -sheet 2 ( $\beta$ H2) and CH6 and it lacks helix  $\alpha 4$  that we represent  
451 with pink color and stabilizes tetrameric assemblies (see also Fig. 4B). The helix CH6 is placed just below the  
452 connecting-loop and fixates it in the compact configuration with the DNA binding domain below the CC. Helix  $\alpha 4$  that  
453 stabilizes tetrameric assemblies is not required for formation of the octamer, and probably its absence facilitates  
454 octamerization as it destabilizes tetramerization.

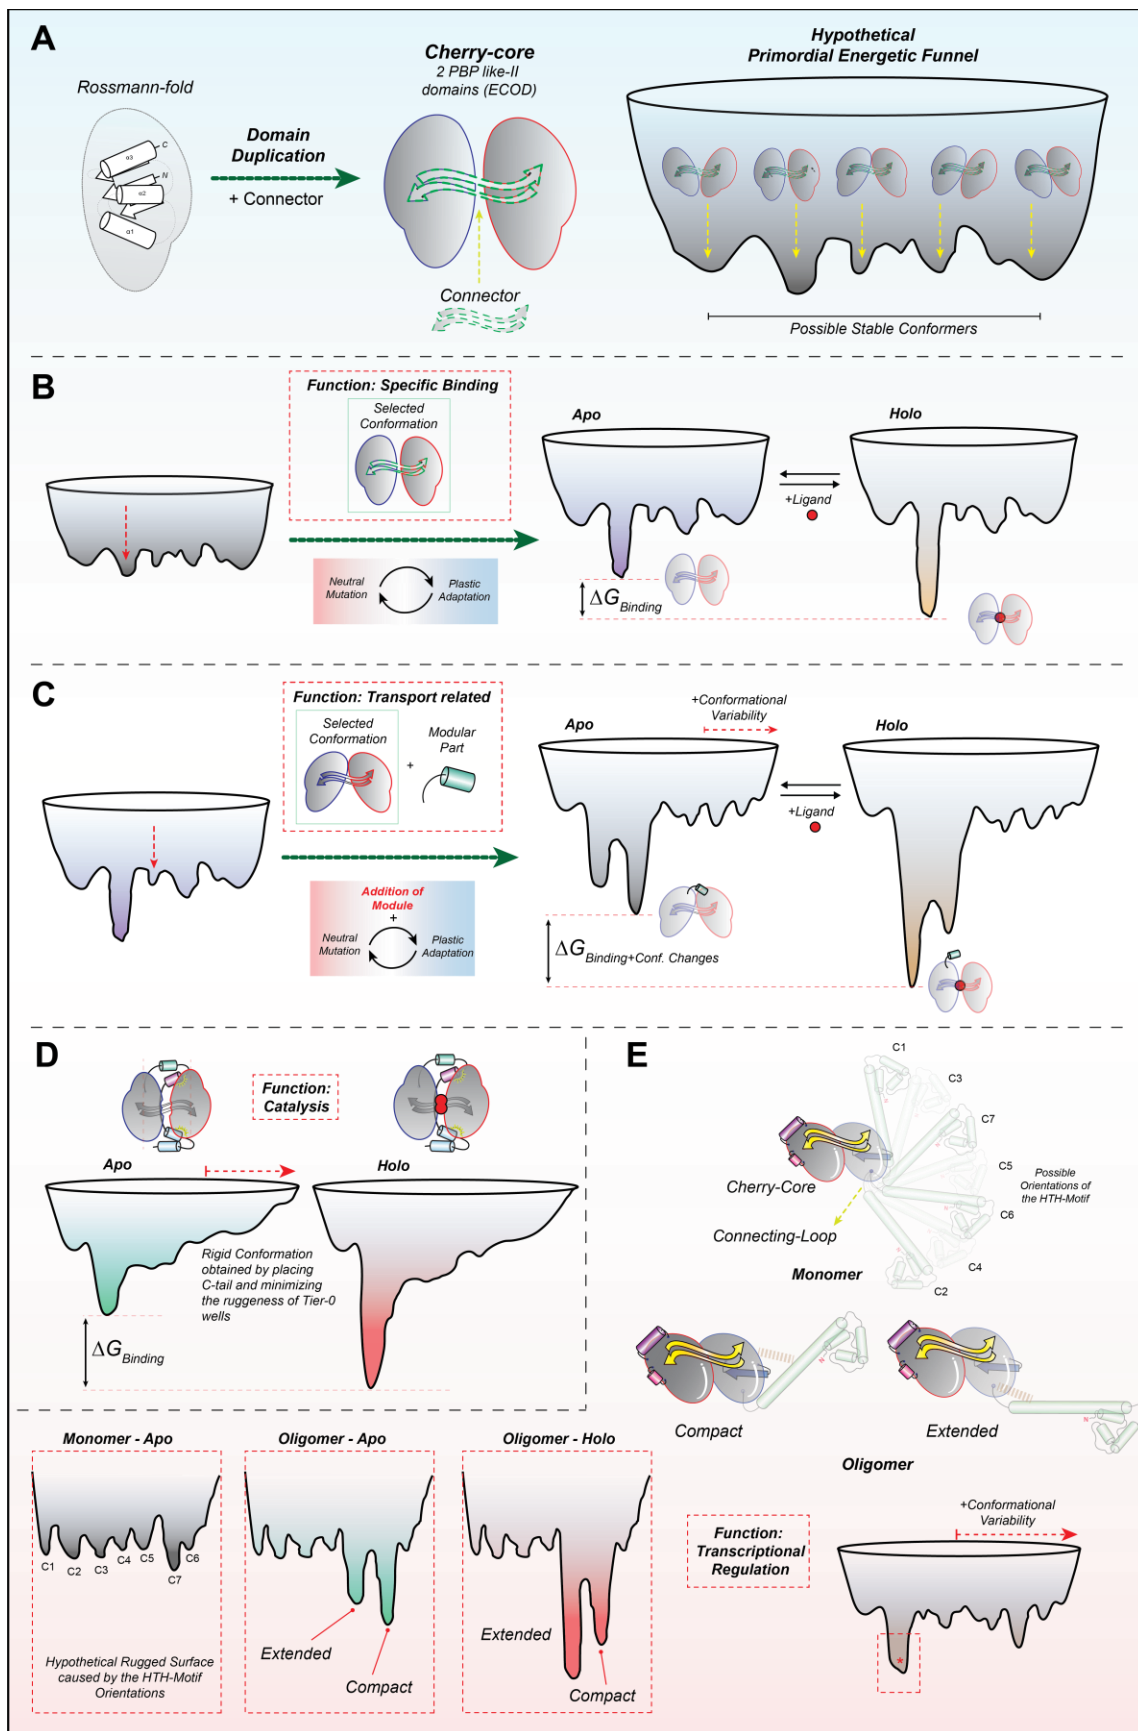



456 **Figure S8.** Hypothetical Energetic Funnels for the visualization of the effects of Modularity on the Evolvability; related  
457 to Fig. 6. (A) According to the view of generalists (39), an ancestral structure composed of two Rossmann-like domains  
458 can acquire many distinct structural states depending on the arrangement of the two domains relative to each other.  
459 The exchange between the different conformers is governed by the properties of the connector. The energetic funnel  
460 of such an assembly will have many isoenergetic wells and manifest increased ruggedness, thus a high degree of  
461 ligand promiscuity (see also text for details). (B) Evolution of a generic 'primordial' two domain protein becoming a  
462 specialized *cherry-core*: When the two domains are linked with a  $\beta$ -sheet, a fix-length polypeptide chain emerges and  
463 a specific well (indicated with red arrow) is selected. However, it remains elusive if the evolution process is facilitated  
464 by utilizing either: (i) the positive selection (direct deepening of the well) or (ii) negative selection (destabilization of non-  
465 beneficial or unfunctional structures; indirectly deepen the well *relative* to other wells, becoming shallow). In the case  
466 of negative selection, the consecutive rounds of neutral mutations followed by plastic adaptations might indeed  
467 destabilized the wells of the non-functional structural states. The process results in the *relative* deepening and  
468 smoothening of the native state well (i.e. closed state, compared to the other wells) conferring ligand specificity (see  
469 discussion for details). The aforementioned structural arrangement represents the conserved *CC* structure. The *CC*  
470 without embellishments is not encountered in extant proteins. Probably because the function of such a structure could  
471 be -solely- binding. As the *CC still* has the "remnants" of the highly-promiscuous ancestral two type-II PBP domains,  
472 we anticipate that this structure would exhibit a relatively increased ligand promiscuity compared to the evolved *CCPs*.  
473 (C-E) Addition of the modular parts paves the way to select a second well on the funnel. If the presence of the module  
474 is beneficial for evolving the new function, nature may then introduce additional mutations to integrate the module into  
475 the core. Adopting the concept of protein evolvability, rounds of neutral mutations might be introduced synergistically  
476 on the module and the core and thus "select" the well of the beneficial structural state. (C) A modular part represented  
477 by an asymmetric C-tail directs the evolutionary pressure to deepen one other specific well. Again, rounds of Neutral  
478 mutations coupled with plastic adaptations can greatly deepen this well, beyond the initial *CC* well (closed state), to  
479 create the open state well. This well is deep/smooth having increased ligand specificity. A distinct chemical environment  
480 represented by the presence of the ligand generates the *holo* energetic funnel. In the later one, the well corresponding  
481 to the closed state is the deeper. (D) A module consisting of a symmetric C-tail, directs evolution to deepen the closed  
482 state well and minimize the ruggedness of the funnel. This yields a structurally "robust" protein, providing the required  
483 stereochemistry necessary for specific reactions (see *SI Appendix*, Fig. S4A). (E) Addition of an N-terminal domain  
484 having two modules (dimerization helix and DNA binding motif) widens the energetic funnel. In such a case a single  
485 closed well represents the *CC*, but additional ones derive from the flexible N-terminal domain. The *CC* is linked by a  
486 loop to the flexible domain, providing multiple wells in the energetic funnel (C1-C7). Oligomerization of such monomers  
487 will deepen specific wells in the oligomer funnel, similarly to the substrate in the *holo* funnel.  
488  
489

490 **SUPPLEMENTARY TABLES**

491  
492 **Table. S1.** Large-scale Domain Motions (Tier-0 states) observed by comparing the *apo* and *holo* crystal structures. The  
493 domain displacements have been retrieved by the DynDom server using the indicated available crystal structures on  
494 the Protein Data Bank.

|                | <i>Apo</i> Conformation<br>(PDB ID code) | <i>Holo</i> Conformation<br>(PDB ID code) | Moving Domain<br>of Core Scaffold | Rotation Angle<br>(deg) | Translation (Å) |
|----------------|------------------------------------------|-------------------------------------------|-----------------------------------|-------------------------|-----------------|
| <b>Class A</b> | 2F7B                                     | 2F7C                                      | D2                                | 4                       | -0,4            |
|                | 3KOT                                     | 4WKM                                      | -                                 | 0                       | 0               |
|                | 4XWS                                     | 4X6G                                      | -                                 | 0                       | 0               |
|                | 2HXR                                     | 3HFU                                      | -                                 | 0                       | 0               |
| <b>Class B</b> | 4KR5                                     | 4KQP                                      | D2                                | 52,1                    | 0,6             |
|                | 4P0I                                     | 4POW                                      | D2                                | 47,7                    | 1,8             |
|                | 4LA9                                     | 6FXG                                      | D2                                | 39,7                    | 1,0             |
|                | 3ZSF                                     | 2YLN                                      | D2                                | 60,1                    | -1,1            |
| <b>Class C</b> | 3L6G                                     | 3L6H                                      | D2                                | 35                      | -0,2            |
|                | 1SW5                                     | 1SW2                                      | D2                                | 58,9                    | -0,3            |
| <b>Class D</b> | 3S4U                                     | 3QUJ                                      | D2                                | 74,3                    | -0,5            |
| <b>Class E</b> | 2X7P                                     | 2X7Q                                      | D2                                | 13,4                    | -0,3            |
|                | 2I49                                     | 2I4B                                      | -                                 | 0                       | 0               |
|                | 2DE2                                     | 2DE3                                      | -                                 | 0                       | 0               |
| <b>Class F</b> | 1S11                                     | 1S10                                      | D1                                | 26,5                    | -0,2            |
|                | 1O7T                                     | 1D9Y                                      | D1                                | 19,7                    | 0,1             |
|                | 1Y9U                                     | 2OWT                                      | D1                                | 25,4                    | -0,6            |
|                | 2HEU                                     | 2I58                                      | D1                                | 25,5                    | 0,3             |
| <b>Class G</b> | 1OMP                                     | 1ANF                                      | D1                                | 36                      | -0,6            |
|                | 3OOA                                     | 3OO6                                      | D1                                | 37,9                    | 0,3             |
|                | 5DVF                                     | 5DVI                                      | D1                                | 18,9                    | -0,2            |
|                | 1Y3Q                                     | 1Y3N                                      | D1                                | 39,1                    | 0,3             |
|                | 1J1N                                     | 1KWH                                      | D1                                | 29,7                    | 0,4             |

495

496 **Table S2.** Stabilization Interactions of the Tier-0 *apo* and *holo* states. Only those interactions between the C-tail and  
 497 D1/2 that specifically stabilize either the *apo* or *holo* state are shown. For each protein class, the corresponding PDB  
 498 ID code of the *apo* or *holo* structures is indicated. For class E, the only structures differing in the *apo* and *holo* states  
 499 has been analyzed and shown. H (hydrophobic interaction, cut-off distance 5 Å), MSHB (main-chain side-chain  
 500 hydrogen bond), I (ionic interaction, cut-off distance 6 Å), A (aromatic interaction, distance 4-7 Å), SSHB (side-chain  
 501 side-chain hydrogen bond), MMHB (main-chain main-chain hydrogen bond), CP (cation-pi-interaction, cut-off distance  
 502 6 Å) and AS (aromatic-sulphur-interaction, cut-off distance 5 Å).

|                                                  | <i>apo</i> conformation |             |          | <i>holo</i> conformation |             |          |
|--------------------------------------------------|-------------------------|-------------|----------|--------------------------|-------------|----------|
|                                                  | Residue                 | Interaction | Location | Residues                 | Interaction | Location |
| <b>Class A</b><br>(2HXR - 3HFU)                  | -                       | -           | -        | -                        | -           | -        |
|                                                  | Leu480-Pro419           | H           | H1       |                          |             |          |
| <b>Class B –</b><br><b>SBD2</b><br>(4KR5 – 4KQP) | Lys426-Asp477           | MSHB        | H1       |                          |             |          |
|                                                  | Lys426-Lys589           | MSHB        | H1       |                          |             |          |
|                                                  | Glu481-Lys426           | I           | H1       |                          |             |          |
|                                                  | Asp483-Lys422           | I           | H1       |                          |             |          |
|                                                  | Tyr423-Tyr479           | A           | H1       |                          |             |          |
| <b>Class B –</b><br><b>SBD1</b><br>(4LA9 – 6FXG) | Ile249-Pro186           | H           | H1       |                          |             |          |
| <b>Class C</b><br>(3L6G - 3L6H)                  | Trp488Leu545            | H           | H3       | Pro486-Met544            | H           | H3       |
|                                                  | His487-Glu541           | MSHB        | H3       |                          |             |          |
|                                                  | Glu541-His487           | MSHB        | H3       |                          |             |          |
|                                                  | Met70-Leu254            | H           | HD1      | Val73-Leu254             | H           | HD1      |
|                                                  | Met70-Leu257            | H           | HD1      | Leu132-Ile257            | H           | HD1      |
|                                                  | Met70-Ala261            | H           | HD1      | Leu132-Ala261            | H           | HD1      |
|                                                  | Leu132-Phe263           | H           | HD1      | Arg258-Asp74             | SSHB        | HD1      |
|                                                  | Tyr136-Leu291           | H           | HD2      | Phe131-Lys264            | CP          | HD1      |
| <b>Class D</b><br>(3S4U - 3QUJ)                  | Tyr137-Pro256           | H           | HD1      |                          |             |          |
|                                                  | Ala140-Phe263           | H           | HD1      |                          |             |          |
|                                                  | Tyr137-Pro256           | MSHB        | HD1      |                          |             |          |
|                                                  | Tyr137-Pro256           | SSHB        | HD2      |                          |             |          |
|                                                  | Tyr137-Glu259           | SSHB        | HD1      |                          |             |          |
|                                                  | Arg258-Met70            | SSHB        | HD1      |                          |             |          |
|                                                  | Gln259-Tyr137           | SSHB        | HD1      |                          |             |          |
|                                                  | Lys141-Asp295           | I           | HD2      |                          |             |          |
|                                                  | Phe122-Val278           | H           | HE1-HE2  | Tyr118-Val278            | H           | HE1-HE2  |
|                                                  | Val123-Leu273           | H           | HE1      | Tyr118-Ala276            | H           | HE1      |
|                                                  | Val123-Ala276           | H           | HE1      | Phe122-Leu275            | H           | HE1      |
| <b>Class E</b><br>(2X7P – 2X7Q)                  | Thr167-Tyr237           | SSHB        | H1-H3    | Tyr118-Ala276            | MSHB        | HE1      |
|                                                  | Lys170-Asp236           | SSHB        | H1-H3    | Lys170-Asp236            | MSHB        | H1-H3    |
|                                                  | Lys169-Glu244           | I           | H4       | Lys169-Glu240            | I           | H3       |
|                                                  |                         |             |          | Lys170-Aps241            | I           | H3       |
|                                                  |                         |             |          | Tyr237-Lys170            | CP          | H1-H3    |
|                                                  | Ile60-Tyr301            | H           | H5       | Lys202-Leu256            | MSHB        | H1       |
|                                                  | Met64-Tyr301            | H           | H5       | Phe220-Trp284            | A           | H2       |
| <b>Class F</b><br>(1SI1 – 1SI0)                  | Leu294-Gln87            | MMHB        | H5       |                          |             |          |
|                                                  | Ser91-Glu295            | MSHB        | H5       |                          |             |          |
|                                                  | Ser91-Glu295            | SSHB        | H5       |                          |             |          |
|                                                  | Phe220-Tyr269           | A           | H1-H2    |                          |             |          |
|                                                  | Tyr301-Met64            | AS          | H5       |                          |             |          |
|                                                  | Tyr90-Met321            | H           | H4       | Ala63-Met330             | H           | H4-H5    |
|                                                  | Phe92-Met321            | H           | H4       | Tyr99-Pro334             | H           | H5       |
|                                                  | Phe92-Ala324            | H           | H4       | Trp232-Pro298            | H           | H1-H2    |
|                                                  | Tyr99-Ile333            | H           | H4-H5    | Gly68-Asn332             | MMHB        | H4-H5    |
| <b>Class G</b><br>(1OMP – 1ANF)                  | Ala168-Pro331           | H           | H4-H5    | His64-Met330             | MSHB        | H4-H5    |
|                                                  | Ala168-Met336           | H           | H5       | Asn332-Ala96             | MSHB        | H4-H5    |
|                                                  | Ala168-Glu328           | MSHB        | H4-H5    | Asp65-Met330             | SSHB        | H4-H5    |
|                                                  | Asp184-Gln365           | MSHB        | H5       | Trp340-Asp65             | SSHB        | H5       |
|                                                  | Trp158-Glu328           | SSHB        | H4-H5    |                          |             |          |
|                                                  | Tyr90-Met321            | AS          | H4       |                          |             |          |

503

504 **Table S3.** Apparent Melting Temperature Deduced from Intrinsic Trp Fluorescence of CynR. Intrinsic Trp fluorescence  
 505 as a function of temperature (10°C-70°C) yielded a main  $T_m$  (apparent) and a secondary one characteristic of the presence  
 506 of azide.

|       | T <sub>m</sub> (°C) |           |       |
|-------|---------------------|-----------|-------|
|       | Primary             | Secondary | Azide |
| - DNA | 54.6                | N.A.      | -     |
|       | 55.3                | 26.9      | +     |
| + DNA | 48.1                | N.A.      | -     |
|       | 48.3                | 26.5      | +     |

507 **Table S4.** Tier-0 states of the indicated protomers within the tetrameric assemblies of the class A transcription factors.  
 508 Analysis as described in *SI Appendix*, Table. S1  
 509

|                | Conformation 1 (PDB ID code - Chain) | Conformation 2 (PDB ID code - Chain) | Moving Domain of Core Scaffold | Rotation Angle (deg) | Translation (Å) |
|----------------|--------------------------------------|--------------------------------------|--------------------------------|----------------------|-----------------|
|                | 6G1B-A                               | 6G1B-B                               | -                              | 0                    | 0               |
|                | 6G1D-A                               | 6G1D-B                               | -                              | 0                    | 0               |
|                | 6G1D-A                               | 6G1D-C                               | -                              | 0                    | 0               |
|                | 6G1D-A                               | 6G1D-D                               | -                              | 0                    | 0               |
| <b>Class A</b> | 6G4R-A                               | 6G4R-B                               | -                              | 0                    | 0               |
|                | 6G4R-A                               | 6G4R-C                               | -                              | 0                    | 0               |
|                | 6G4R-A                               | 6G4R-D                               | -                              | 0                    | 0               |
|                | 6G1B-A                               | 6G1D-A                               | -                              | 0                    | 0               |
|                | 6G1D-A                               | 6G4R-A                               | -                              | 0                    | 0               |

510

511

512

513 **Table S5.** Apparent FRET Efficiencies and C $\alpha$ -C $\alpha$  Distances derived from crystal structures. The apparent FRET  
 514 efficiencies are the center and the errors are the limits of the 95% confidence interval of the Gaussian fit in Fig. 3 and  
 515 Fig. 5. The PDB ID codes of proteins are reported in the SI Appendix, Methods section and SI Appendix Table. S1.

|                     | Apparent FRET efficiency |                     | C $\alpha$ - C $\alpha$ distance (Å) |                     |
|---------------------|--------------------------|---------------------|--------------------------------------|---------------------|
|                     | Apo condition            | Saturated condition | Open conformation                    | Closed conformation |
| CynR (C137 R233C)   | 0.703 $\pm$ 0.003        | 0.707 $\pm$ 0.003   | 41.8                                 |                     |
| CmpA (T89C N166C)   | 0.439 $\pm$ 0.009        | 0.425 $\pm$ 0.010   | 48.2                                 |                     |
| MalE(T36C S352C)    | 0.586 $\pm$ 0.002        | 0.780 $\pm$ 0.002   | 51.3                                 | 40.8                |
| OpuAC (V360C V423C) | 0.550 $\pm$ 0.003        | 0.696 $\pm$ 0.003   | 45.7                                 | 36.3                |
| SBD1 (T159C G87C)   | 0.612 $\pm$ 0.003        | 0.805 $\pm$ 0.002   | 44.8                                 | 34.2                |
| SBD2 (T369C S451C)  | 0.586 $\pm$ 0.002        | 0.736 $\pm$ 0.002   | 49.0                                 | 40.1                |
| nFbp (N184C Q237C)  | 0.429 $\pm$ 0.003        | 0.470 $\pm$ 0.001   | 52.8                                 | 47.3                |
| PhnD (N8C P130C)    | 0.466 $\pm$ 0.004        | 0.647 $\pm$ 0.002   | 54.8                                 | 45.4                |
| ProMalE(T36C S352C) | 0.558 $\pm$ 0.007        | 0.762 $\pm$ 0.002   | 51.3                                 | 40.8                |

516

517

## 518 SUPPLEMENTARY DATASETS

519

520 **Dataset S1.** Extended Sequence Based Phylogenetic tree. Sequence-based extended phylogenetic tree based on  
521 percentage of sequence identity. Summary of this tree is presented in *SI Appendix*, Fig. S1A. Every protein is  
522 represented by its PDB ID (known structures) or UniProt ID followed by its localization identifier (SP, for presence of  
523 signal peptide; Lipidation, Glycosylation for lipidation and glycosylation signals respectively). If protein origin is not  
524 bacterial, origin (Archaea, Eukarya, Virus) is indicated.

525

526 **Dataset S2.** Complete Phylogenetic Trees. Structure- and sequence-based phylogenetic trees of the 53 identified  
527 cherry-core proteins with known structures. Summary of this tree is presented in Fig. 1C and *SI Appendix*, Fig. S1B-D.  
528 Trees are constructed after the entire polypeptide chain (A, B), the CC only (C) and the C-tail only (D). Every protein is  
529 represented by its PDB ID code.

530

531 **Dataset S3.** Secondary Structure Alignment Table. (Sheet 1): Revised alignments of *cherry-core* proteins. The  
532 identified proteins were sorted in different classes (**A-G**) depending on their N- & C-terminal regions (see also Fig. 1C,  
533 D). The alignment of the secondary structure elements is presented (**H**, for  $\alpha$ -helix; **S**, for  $\beta$ -sheets) followed by the  
534 corresponding residues (the number of residues forming the secondary structural element is indicated in parenthesis).  
535 Every protein is represented by its PDB ID code followed by its chain identifier. We represent equivalent secondary  
536 structure elements (occupying the same place in the 3D space) with the same uniform color throughout a column.  
537 Secondary structure elements that are joined (i.e. two  $\alpha$ -helices becoming a long one) are marked by red letters. We  
538 indicated subclasses with asterisks. Subclasses represent proteins having minor differences in the secondary structure  
539 elements of their C-tails, with respect to all other proteins of the same class, e.g., A\* has an additional terminal helix at  
540 the C-tail similar to H1, but positioned in a different location in the 3D space compared to A. Similarly, for B\* which has  
541 an additional helix (CH5) and an extra small  $\beta$ -sheet compared to B. The class B\*\* has two extremely short helices  
542 CH6 and H1, while sub-class B\*\*\* and G\* have one additional helix at the C-tail with respect to other B and G class  
543 members, respectively. (Sheet 2) Classification of the proteins included in Sheet 1 according to the ECOD database.

544

545 **Dataset S4.** HDX-MS Data for CynR. Excel file composed of 4 sheets containing 3 tables (F4A, F4B, F4C) and  
546 coverage maps. The sheets include detailed description of the conditions and analysis of the HDX-MS experiments.

547

548 **Dataset S5.** HDX-MS Data for MalE. Excel file composed of 7 sheets containing 5 tables (F5A, F5B, F5C, F5D, F5E),  
549 difference plots and coverage maps. The sheets include detailed description of the conditions and analysis of the HDX-  
550 MS experiments.

551

552 **Dataset S6.** Structure based phylogenetic trees of class A CCPs. Results as obtained from the Dali server (see *SI*  
553 *Appendix*, Material and Method). The structure based phylogenetic tree of class A proteins with known oligomeric  
554 structures (see *SI Appendix*, Fig. S7). Top part contains full length class A transcription factors (HTH motif/dimerization  
555 helix and CC) while bottom part, only the CC.

556

557 **Dataset S7.** Interaction of CynR connecting loop/dimerization helix with the CC. The *cynR* sequence was modelled  
558 after the known oligomeric high-resolution structures (see *SI Appendix*, Fig. S7 and Material and Method section). The  
559 contact interfaces between the dimerization helix and the CC derived from the structures (left part of the excel table) or  
560 from the corresponding models (right part of the excel table) were analyzed in the Protein Interaction calculator server,  
561 using standard server settings (alike *SI Appendix*, Table S2, see also *SI Appendix* Material and Method). The residues  
562 forming such interface belong to the connecting-loop or the dimerization helix (indicated as loop and helix respectively)  
563 and elements of the CC (indicated according to the *Dataset* S3). The nature of the interactions, hydrophobic, aromatic,  
564 Cation-Pi, hydrogen-bonds, Ionic are represented with blue, cyan, green, orange and red color respectively.

565

566  
567  
568  
569  
570  
571  
572  
573  
574  
575  
576  
577  
578  
579  
580  
581  
582  
583  
584  
585  
586  
587  
588  
589  
590  
591  
592  
593  
594  
595  
596  
597  
598  
599  
600  
601  
602  
603  
604  
605  
606  
607  
608  
609  
610  
611  
612  
613  
614  
615  
616  
617  
618  
619  
620  
621

## SUPPLEMENTARY REFERENCES

1. A. Prlic *et al.*, Pre-calculated protein structure alignments at the RCSB PDB website. *Bioinformatics* **26**, 2983-2985 (2010).
2. Y. Ye, A. Godzik, Flexible structure alignment by chaining aligned fragment pairs allowing twists. *Bioinformatics* **19 Suppl 2**, ii246-255 (2003).
3. E. Krissinel, K. Henrick, Secondary-structure matching (SSM), a new tool for fast protein structure alignment in three dimensions. *Acta Crystallogr D Biol Crystallogr* **60**, 2256-2268 (2004).
4. L. Holm, L. M. Laakso, Dali server update. *Nucleic acids research* **44**, W351-355 (2016).
5. E. Roberts, J. Eargle, D. Wright, Z. Luthey-Schulten, MultiSeq: unifying sequence and structure data for evolutionary analysis. *BMC bioinformatics* **7**, 382 (2006).
6. W. Humphrey, A. Dalke, K. Schulten, VMD: visual molecular dynamics. *J Mol Graph* **14**, 33-38, 27-38 (1996).
7. S. F. Altschul, W. Gish, W. Miller, E. W. Myers, D. J. Lipman, Basic local alignment search tool. *Journal of molecular biology* **215**, 403-410 (1990).
8. G. P. Poornam, A. Matsumoto, H. Ishida, S. Hayward, A method for the analysis of domain movements in large biomolecular complexes. *Proteins* **76**, 201-212 (2009).
9. D. Taylor, G. Cawley, S. Hayward, Quantitative method for the assignment of hinge and shear mechanism in protein domain movements. *Bioinformatics* **30**, 3189-3196 (2014).
10. K. G. Tina, R. Bhadra, N. Srinivasan, PIC: Protein Interactions Calculator. *Nucleic acids research* **35**, W473-476 (2007).
11. G. Gouridis *et al.*, Conformational dynamics in substrate-binding domains influences transport in the ABC importer GlnPQ. *Nature structural & molecular biology* **22**, 57-64 (2015).
12. J. C. Wolters *et al.*, Ligand binding and crystal structures of the substrate-binding domain of the ABC transporter OpuA. *PLoS one* **5**, e10361 (2010).
13. M. de Boer *et al.*, Conformational and dynamic plasticity in substrate-binding proteins underlies selective transport in ABC importers. *Elife* **8** (2019).
14. J. W. Bok, N. P. Keller, Fast and easy method for construction of plasmid vectors using modified quick-change mutagenesis. *Methods in molecular biology* **944**, 163-174 (2012).
15. C. W. Vander Kooi, Megaprimer method for mutagenesis of DNA. *Methods in enzymology* **529**, 259-269 (2013).
16. D. B. Oliver, R. J. Cabelli, K. M. Dolan, G. P. Jarosik, Azide-resistant mutants of Escherichia coli alter the SecA protein, an azide-sensitive component of the protein export machinery. *Proceedings of the National Academy of Sciences of the United States of America* **87**, 8227-8231 (1990).
17. G. Gouridis, S. Karamanou, M. Koukaki, A. Economou, In vitro assays to analyze translocation of the model secretory preprotein alkaline phosphatase. *Methods in molecular biology* **619**, 157-172 (2010).
18. F. Husada *et al.*, Watching conformational dynamics of ABC transporters with single-molecule tools. *Biochemical Society transactions* **43**, 1041-1047 (2015).
19. E. Nir *et al.*, Shot-noise limited single-molecule FRET histograms: comparison between theory and experiments. *The journal of physical chemistry. B* **110**, 22103-22124 (2006).
20. A. N. Kapanidis *et al.*, Fluorescence-aided molecule sorting: analysis of structure and interactions by alternating-laser excitation of single molecules. *Proceedings of the National Academy of Sciences of the United States of America* **101**, 8936-8941 (2004).
21. R. Roy, S. Hohng, T. Ha, A practical guide to single-molecule FRET. *Nature methods* **5**, 507-516 (2008).
22. T. Cordes, J. Vogelsang, P. Tinnefeld, On the mechanism of Trolox as antiblinking and antibleaching reagent. *Journal of the American Chemical Society* **131**, 5018-5019 (2009).
23. L. R. Rabiner, "A tutorial on hidden Markov models and selected applications in speech recognition" in Readings in speech recognition, W. Alex, L. Kai-Fu, Eds. (Morgan Kaufmann Publishers Inc., 1990), pp. 267-296.
24. L. E. Baum, T. Petrie, Statistical Inference for Probabilistic Functions of Finite State Markov Chains. *Annals of Mathematical Statistics* **37**, 1554-& (1966).
25. A. J. Viterbi, Error Bounds for Convolutional Codes and an Asymptotically Optimum Decoding Algorithm. *Ieee Transactions on Information Theory* **13**, 260-+ (1967).

- 622 26. M. J. Bennett, K. Barakat, J. T. Huzil, J. Tuszynski, D. C. Schriemer, Discovery and  
623 characterization of the laulimalide-microtubule binding mode by mass shift perturbation mapping.  
624 *Chem Biol* **17**, 725-734 (2010).
- 625 27. A. Tsirigotaki, R. V. Elzen, P. V. Veken, A. M. Lambeir, A. Economou, Dynamics and ligand-  
626 induced conformational changes in human prolyl oligopeptidase analyzed by hydrogen/deuterium  
627 exchange mass spectrometry. *Sci Rep* **7**, 2456 (2017).
- 628 28. A. Tsirigotaki, M. Papanastasiou, M. B. Trelle, T. J. Jorgensen, A. Economou, Analysis of  
629 Translocation-Competent Secretory Proteins by HDX-MS. *Methods Enzymol* **586**, 57-83 (2017).
- 630 29. L. Bordoli *et al.*, Protein structure homology modeling using SWISS-MODEL workspace. *Nat*  
631 *Protoc* **4**, 1-13 (2009).
- 632 30. K. Arnold, L. Bordoli, J. Kopp, T. Schwede, The SWISS-MODEL workspace: a web-based  
633 environment for protein structure homology modelling. *Bioinformatics* **22**, 195-201 (2006).
- 634 31. M. Bertoni, F. Kiefer, M. Biasini, L. Bordoli, T. Schwede, Modeling protein quaternary structure of  
635 homo- and hetero-oligomers beyond binary interactions by homology. *Sci Rep* **7**, 10480 (2017).
- 636 32. S. Bienert *et al.*, The SWISS-MODEL Repository-new features and functionality. *Nucleic Acids*  
637 *Res* **45**, D313-D319 (2017).
- 638 33. A. Waterhouse *et al.*, SWISS-MODEL: homology modelling of protein structures and complexes.  
639 *Nucleic Acids Res* **46**, W296-W303 (2018).
- 640 34. C. UniProt, UniProt: a worldwide hub of protein knowledge. *Nucleic acids research* **47**, D506-  
641 D515 (2019).
- 642 35. R. Y. Lai *et al.*, Thiamin pyrimidine biosynthesis in *Candida albicans* : a remarkable reaction  
643 between histidine and pyridoxal phosphate. *Journal of the American Chemical Society* **134**, 9157-  
644 9159 (2012).
- 645 36. M. P. Koentjoro, N. Adachi, M. Senda, N. Ogawa, T. Senda, Crystal structure of the DNA-binding  
646 domain of the LysR-type transcriptional regulator CbnR in complex with a DNA fragment of the  
647 recognition-binding site in the promoter region. *FEBS J* **285**, 977-989 (2018).
- 648 37. S. Sainsbury *et al.*, The structure of CrgA from *Neisseria meningitidis* reveals a new octameric  
649 assembly state for LysR transcriptional regulators. *Nucleic acids research* **37**, 4545-4558 (2009).
- 650 38. B. Pedre *et al.*, Structural snapshots of OxyR reveal the peroxidatic mechanism of H<sub>2</sub>O<sub>2</sub> sensing.  
651 *Proceedings of the National Academy of Sciences of the United States of America* **115**, E11623-  
652 E11632 (2018).
- 653 39. D. S. Tawfik, I. Gruic-Sovulj, How evolution shapes enzyme selectivity - lessons from aminoacyl-  
654 tRNA synthetases and other amino acid utilizing enzymes. *FEBS J* **287**, 1284-1305 (2020).
- 655
